# Supplementary material
Source: PubMed Central journal article supplement (PMC7832455)
Supplement: TBSD_A_1872420_SM2545.pdf [file TBSD_A_1872420_SM2545.pdf]

Supplementary material.

A

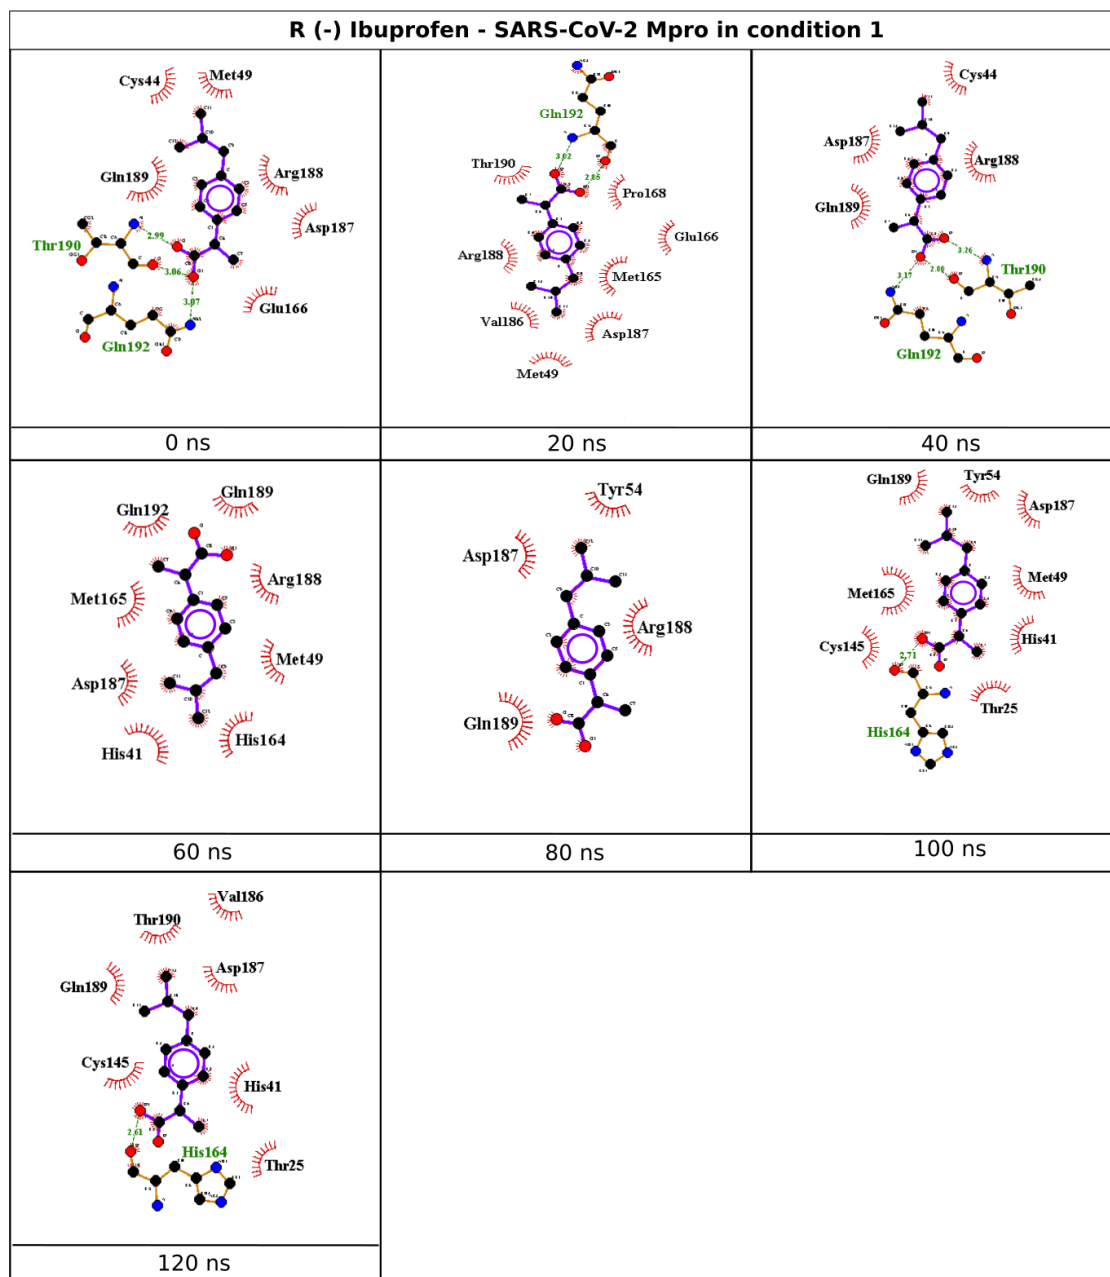

**Figure S1. A.** 2D interactions showing hydrogen bonds (green) and hydrophobic interactions (red) every 20 ns of MD-simulations in the binding pocket of the SARS-CoV-2 Mpro with R(-)Ibuprofen in condition 1, visualized by LigPlot+.

B

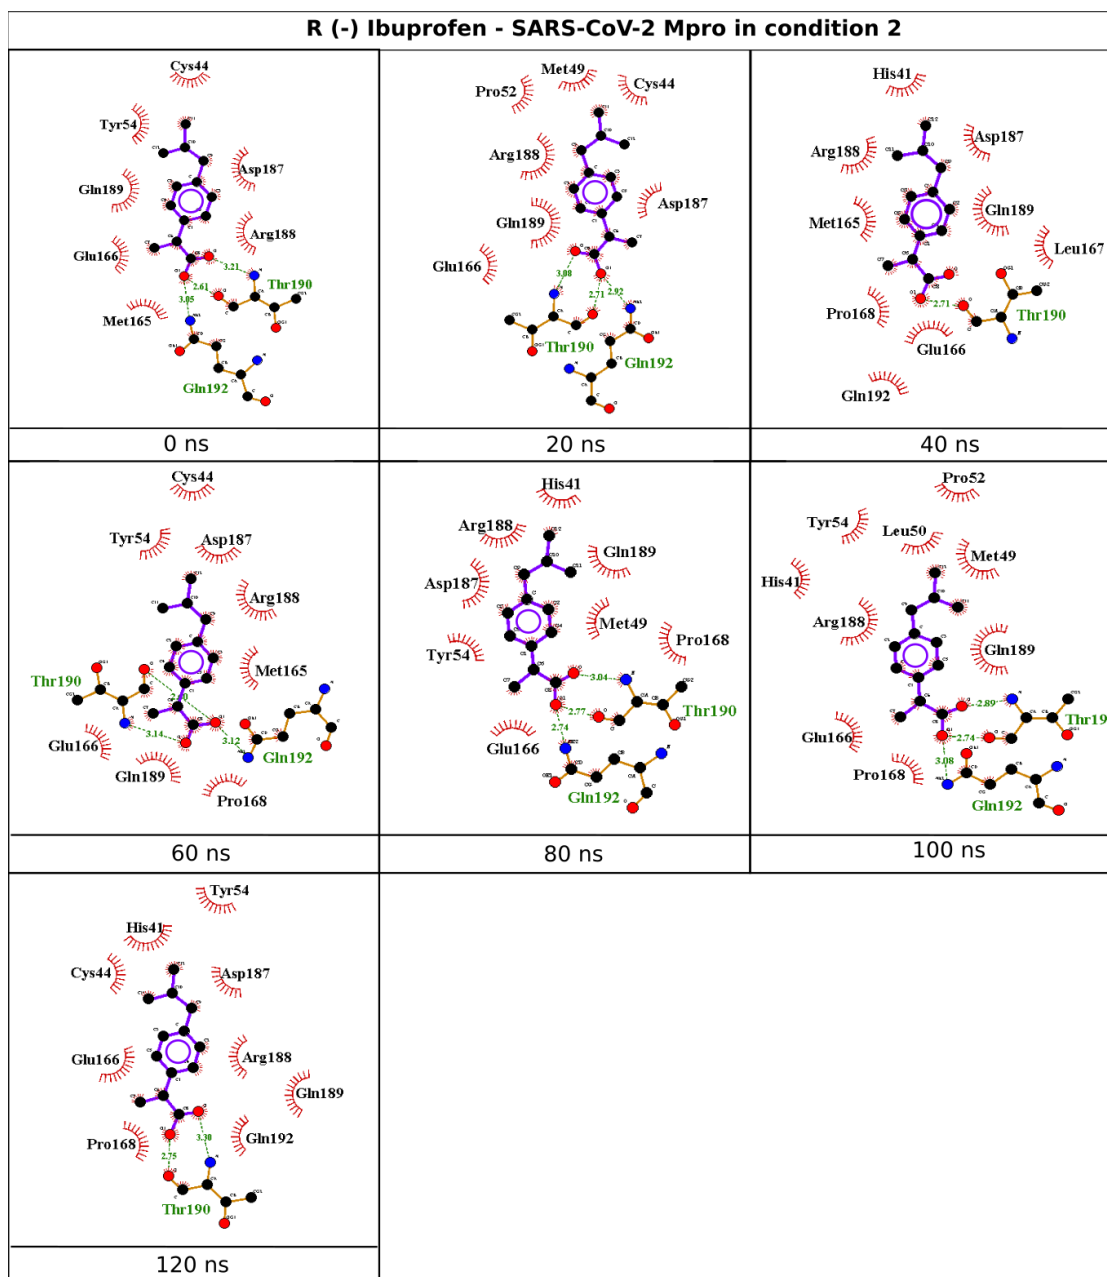

**Figure S1. B.** 2D interactions showing hydrogen bonds (green) and hydrophobic interactions (red) every 20 ns of MD-simulations in the binding pocket of the SARS-CoV-2 Mpro with R(-)Ibuprofen in condition 2, visualized by LigPlot+.

C

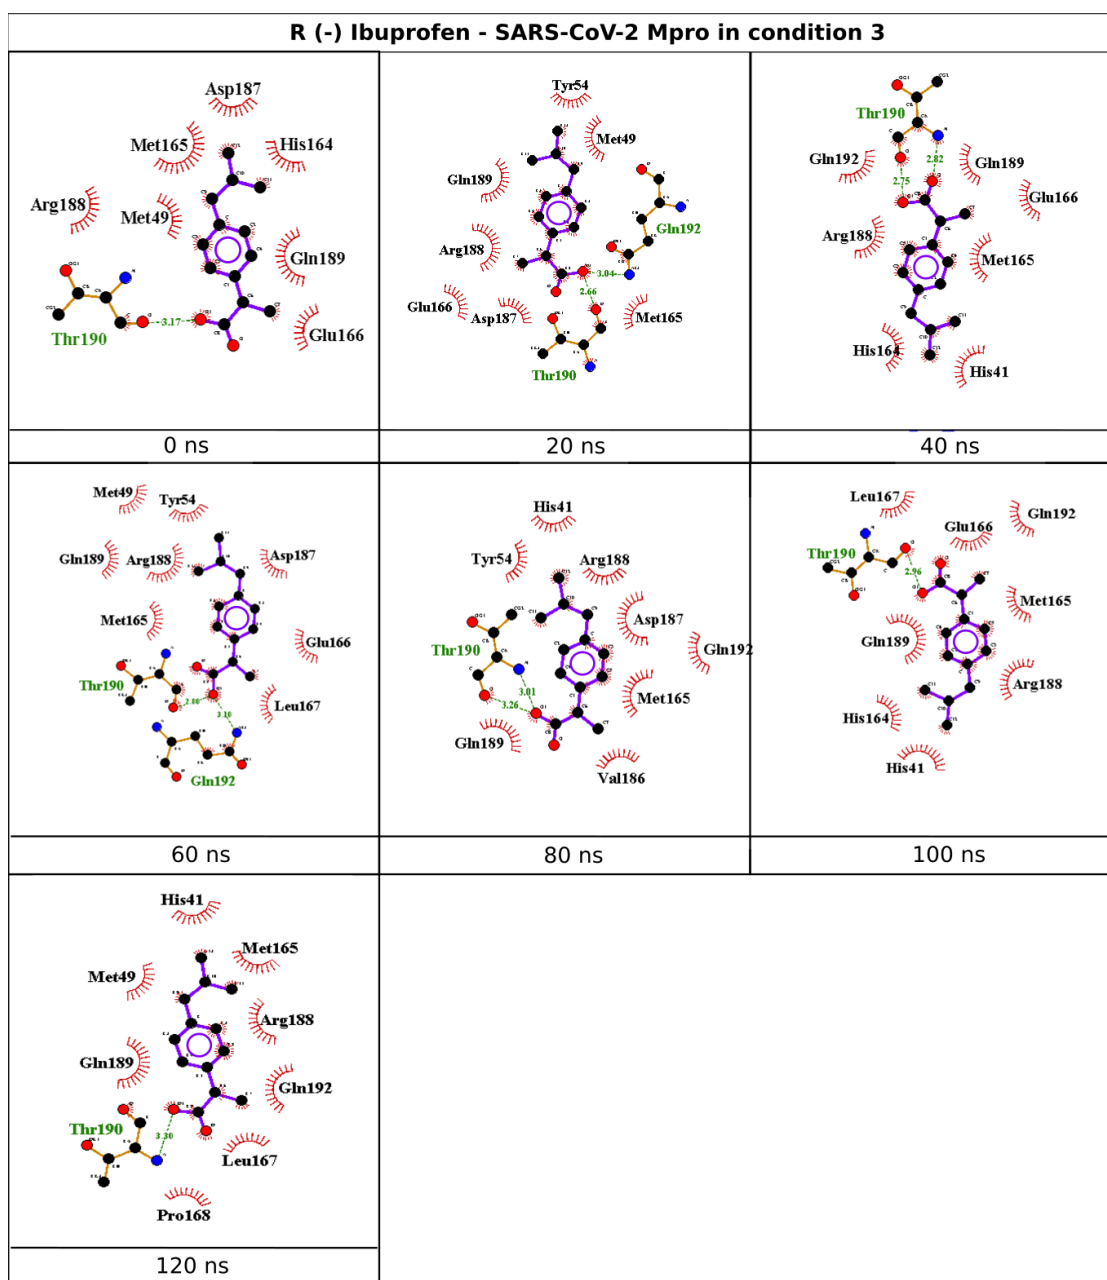

**Figure S1. C.** 2D interactions showing hydrogen bonds (green) and hydrophobic interactions (red) every 20 ns of MD-simulations in the binding pocket of the SARS-CoV-2 Mpro with R(-)Ibuprofen in condition 3, visualized by LigPlot+.

D

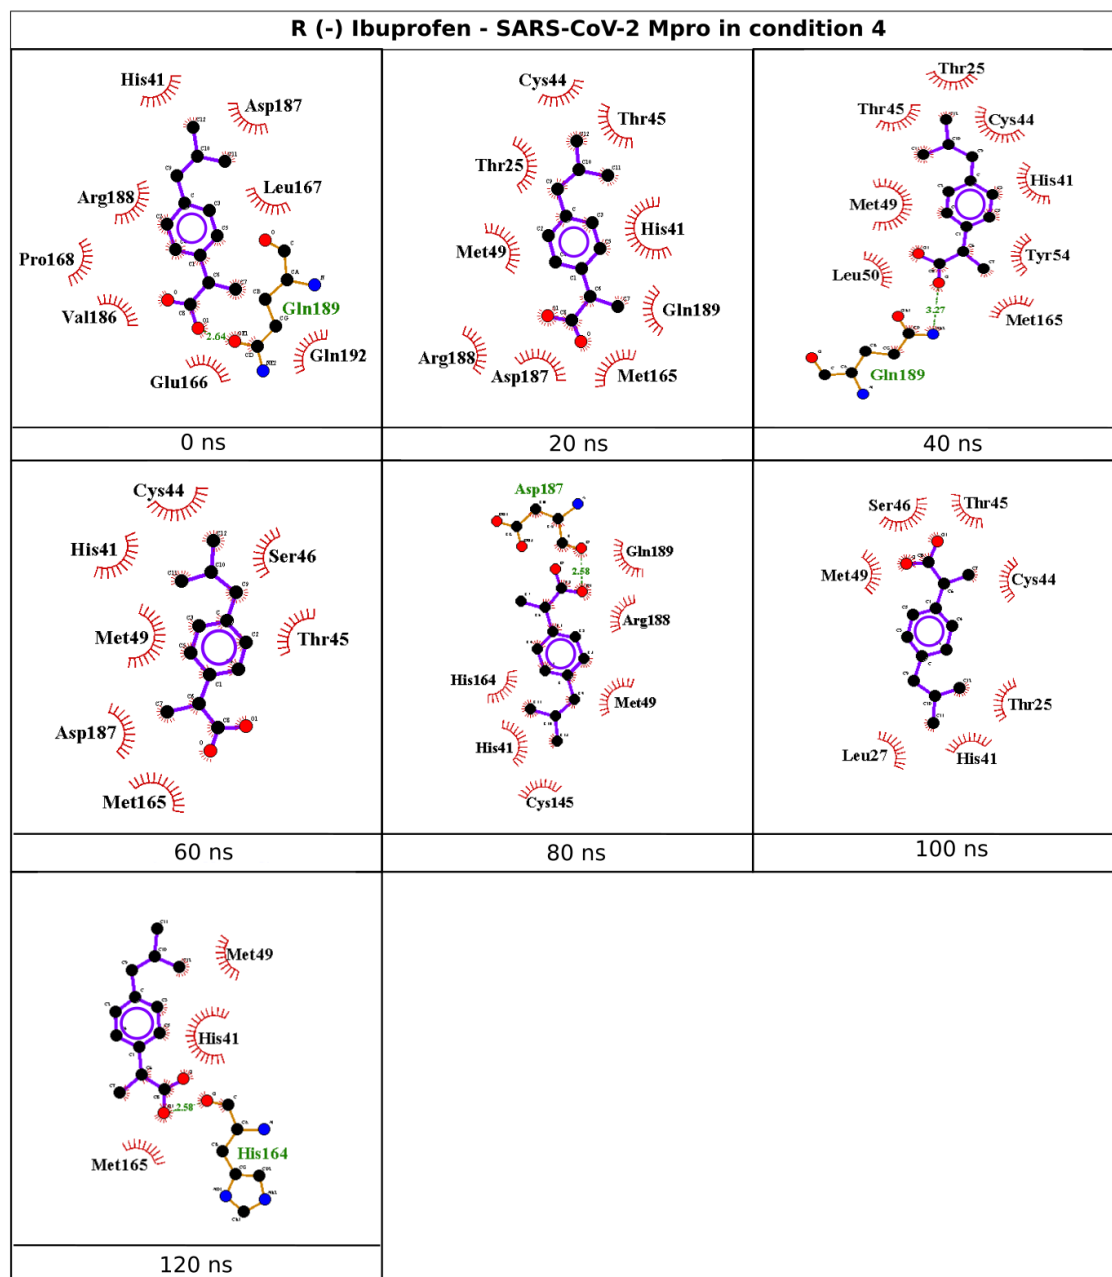

**Figure S1. D.** 2D interactions showing hydrogen bonds (green) and hydrophobic interactions (red) every 20 ns of MD-simulations in the binding pocket of the SARS-CoV-2 Mpro with R(-)Ibuprofen in condition 4, visualized by LigPlot+.

E

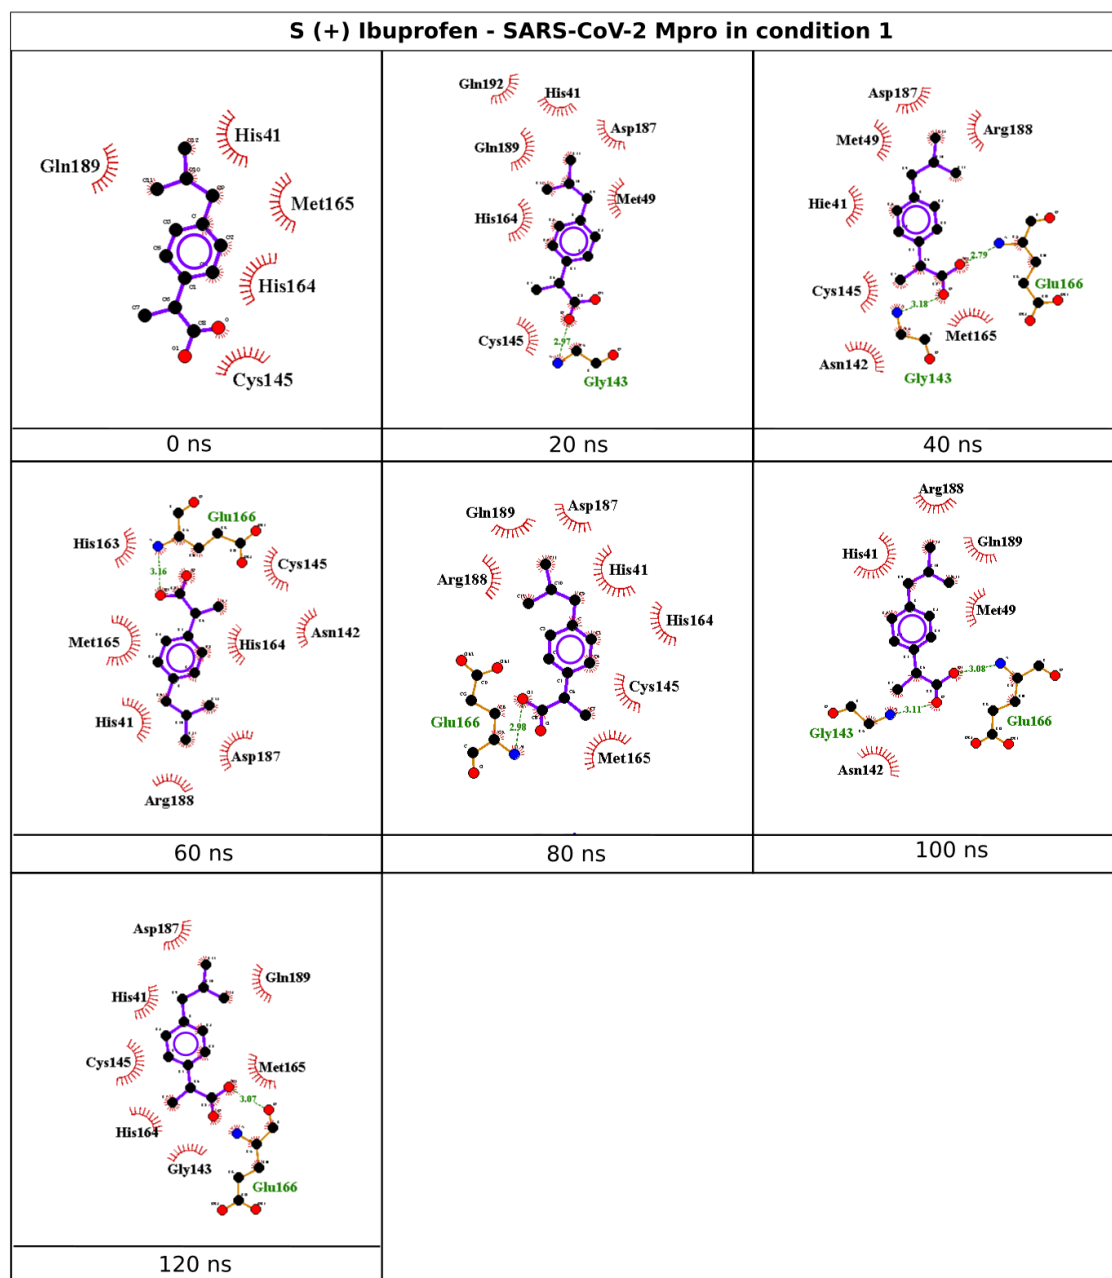

**Figure S1. E.** 2D interactions showing hydrogen bonds (green) and hydrophobic interactions (red) every 20 ns of MD-simulations in the binding pocket of the SARS-CoV-2 Mpro with S(+)-Ibuprofen in condition 1, visualized by LigPlot+.

F

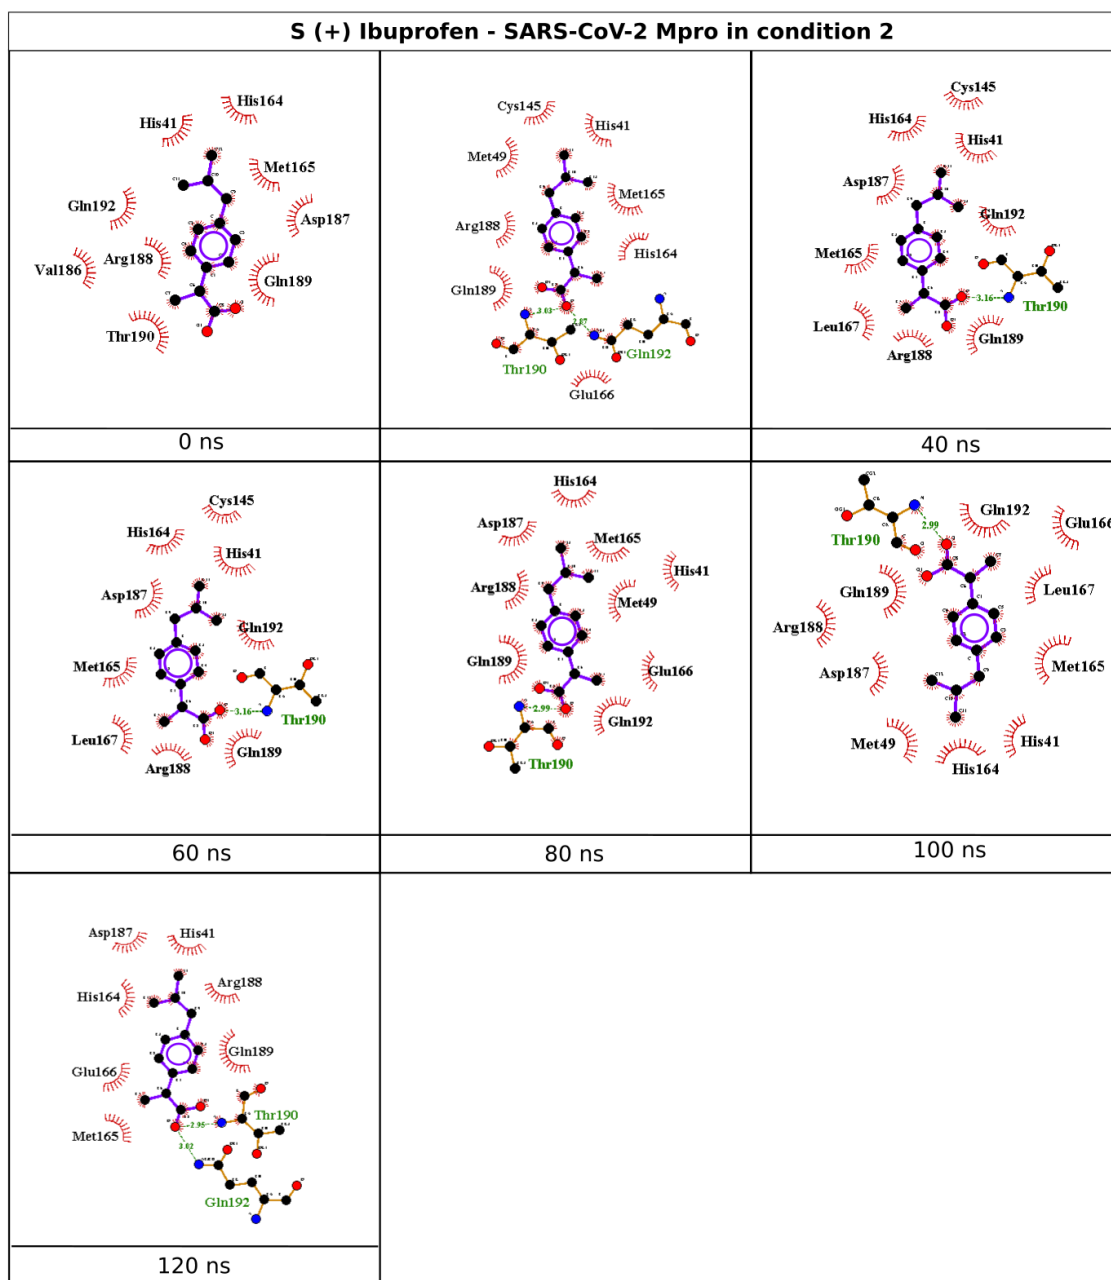

**Figure S1. F.** 2D interactions showing hydrogen bonds (green) and hydrophobic interactions (red) every 20 ns of MD-simulations in the binding pocket of the SARS-CoV-2 Mpro with S(+)-Ibuprofen in condition 2, visualized by LigPlot+.

G

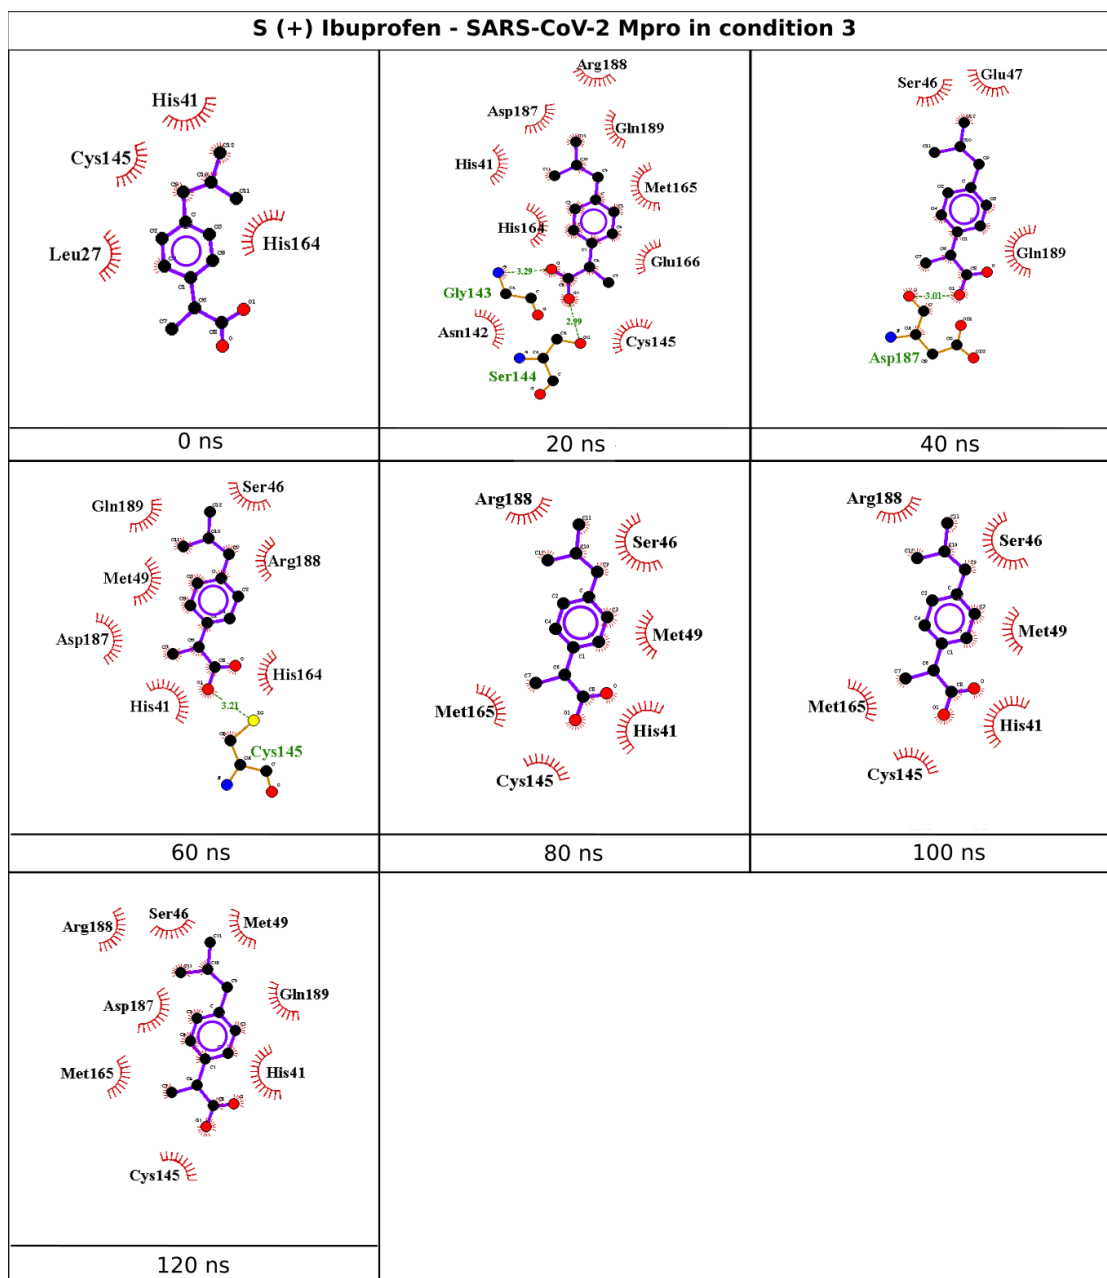

**Figure S1. G.** 2D interactions showing hydrogen bonds (green) and hydrophobic interactions (red) every 20 ns of MD-simulations in the binding pocket of the SARS-CoV-2 Mpro with S(+)-Ibuprofen in condition 3, visualized by LigPlot+.

H

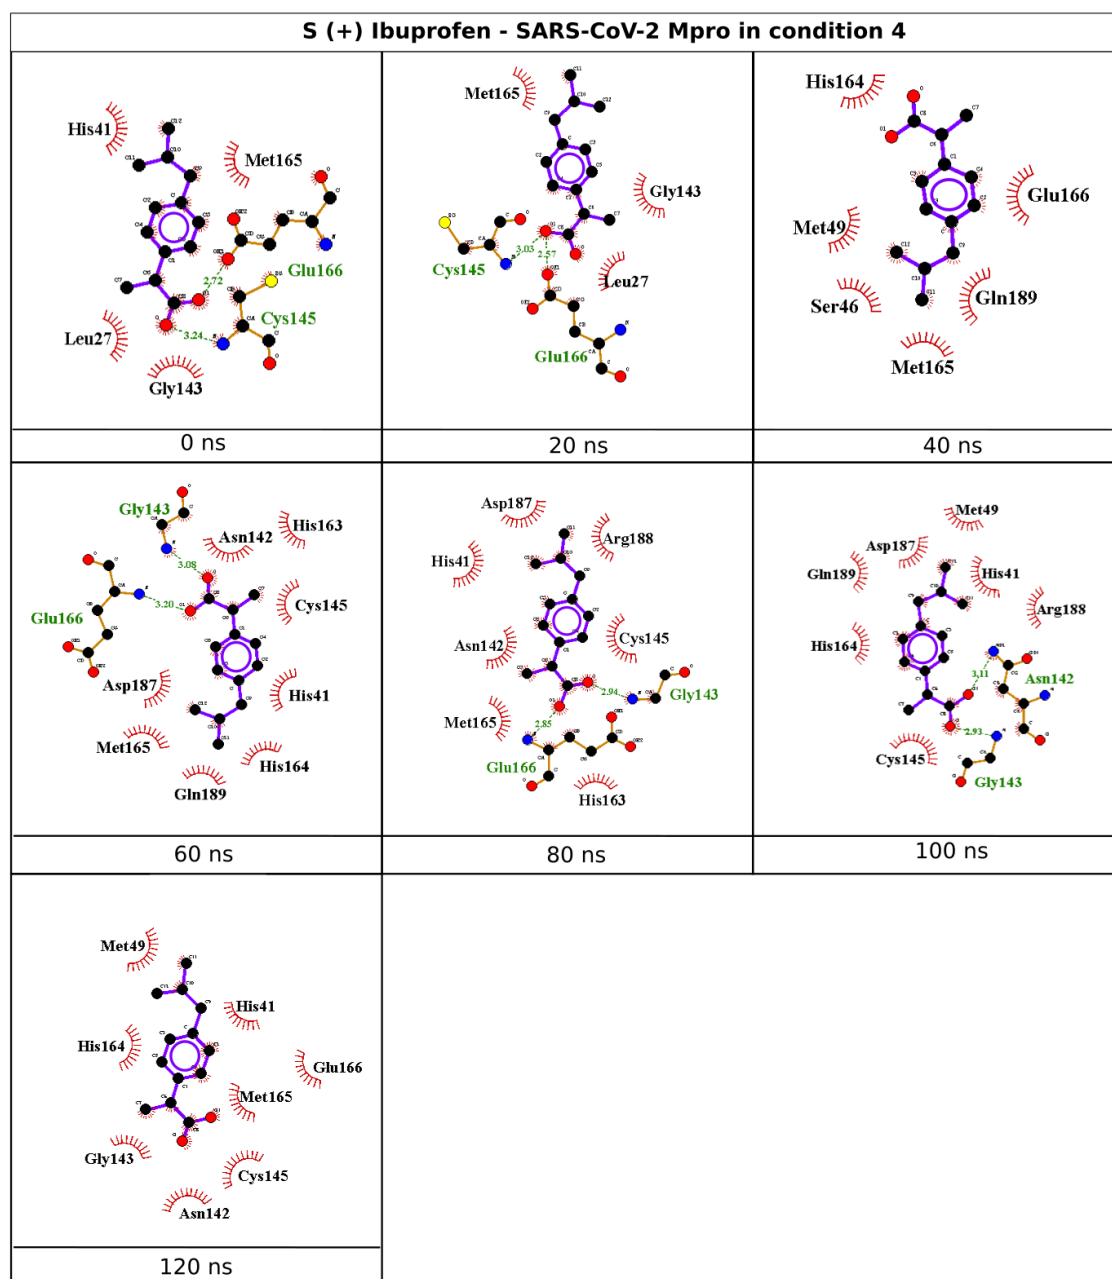

**Figure S1. H.** 2D interactions showing hydrogen bonds (green) and hydrophobic interactions (red) every 20 ns of MD-simulations in the binding pocket of the SARS-CoV-2 Mpro with S(+)-Ibuprofen in condition 4, visualized by LigPlot+.



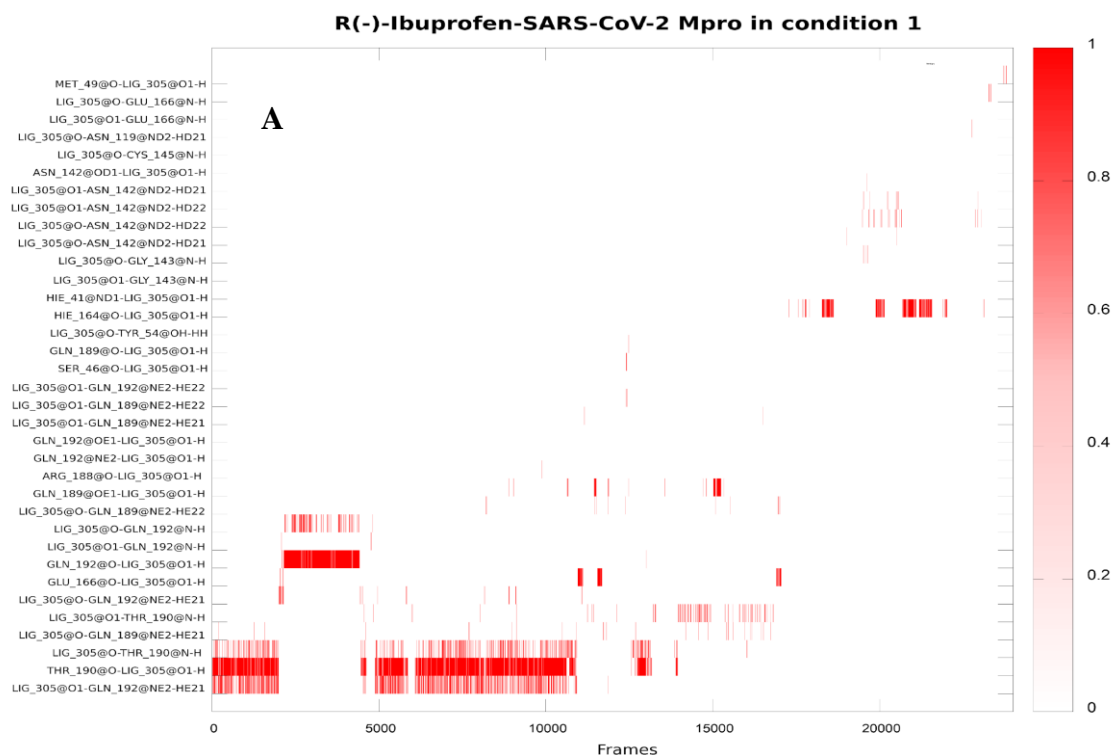

**Figure S2. A.** Hydrogen bonds analysis of complex R(-)-Ibuprofen-SARS-CoV-2 Mpro (red) in condition 1.

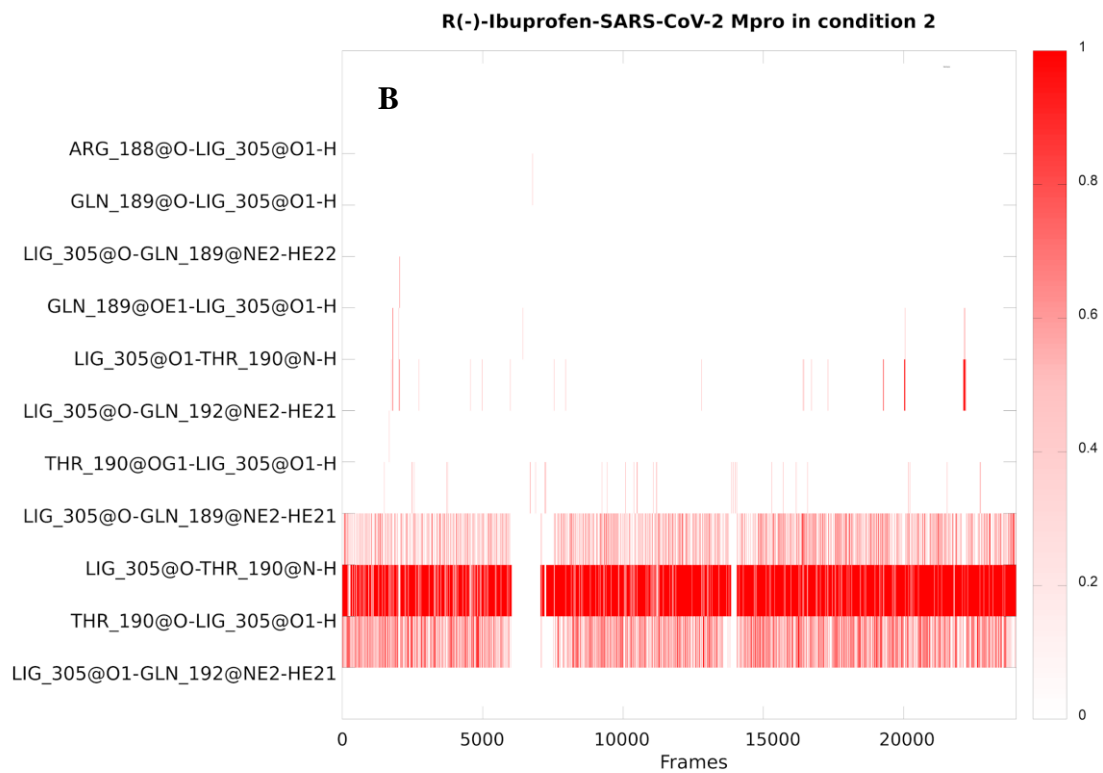

**Figure S2. B.** Hydrogen bonds analysis of complex R(-)-Ibuprofen-SARS-CoV-2 Mpro (red) in condition 2.

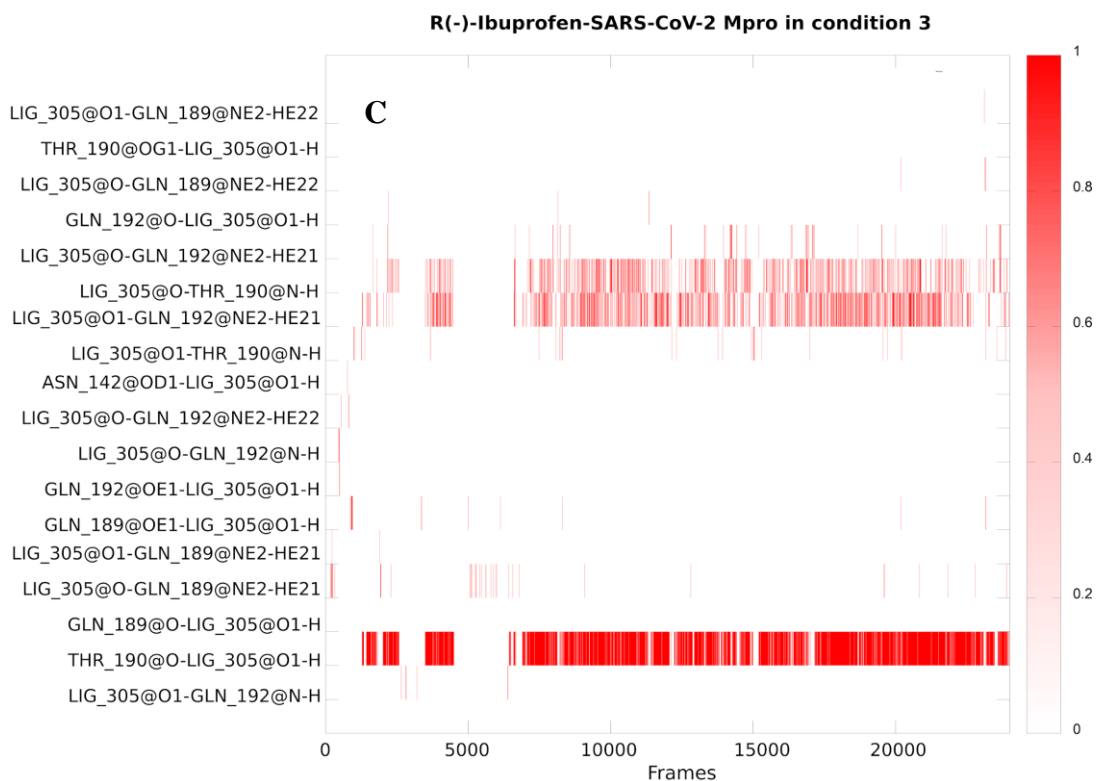

**Figure S2. C.** Hydrogen bonds analysis of complex R(-)Ibuprofen-SARS-CoV-2 Mpro (red) in condition 3.

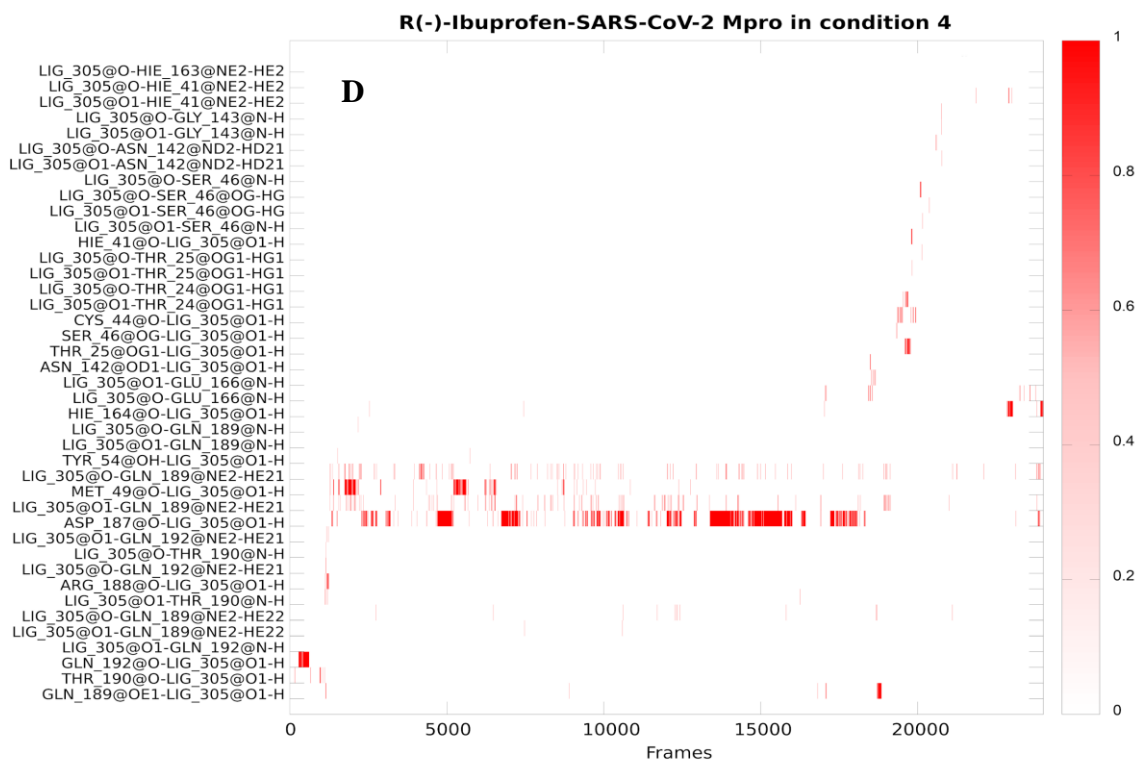

**Figure S2. D.** Hydrogen bonds analysis of complex R(-)Ibuprofen-SARS-CoV-2 Mpro (red) in condition 4.

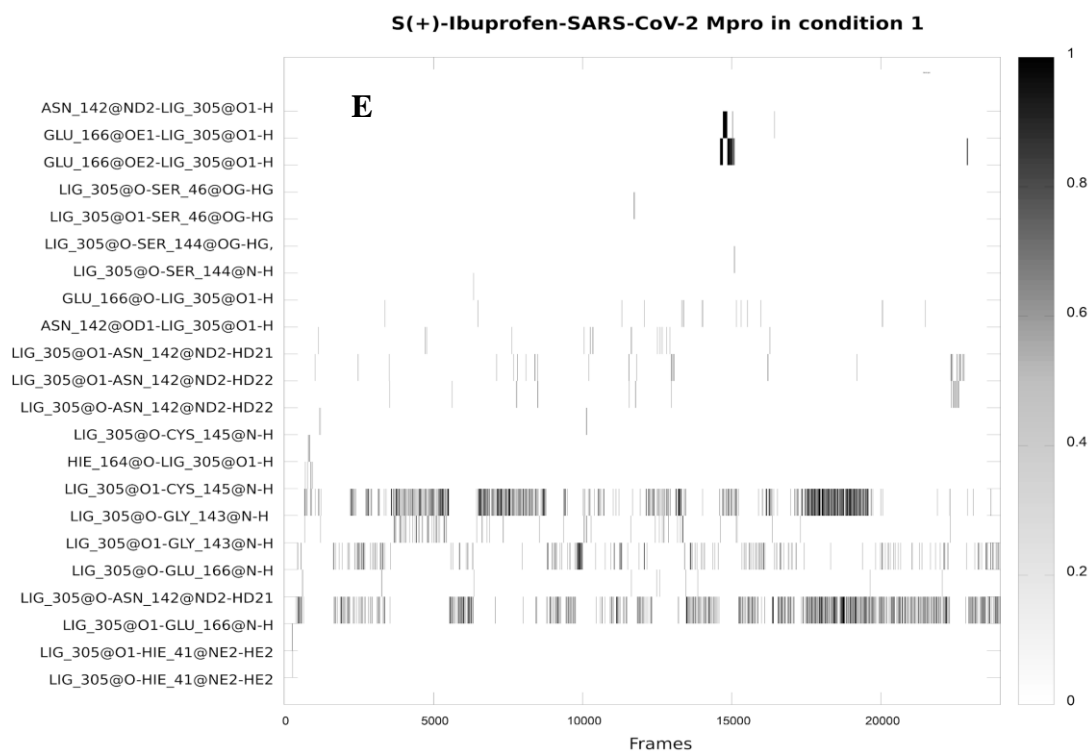

**Figure S2. E.** Hydrogen bonds analysis of complex S(+)-Ibuprofen-SARS-CoV-2 Mpro (red) in condition 1.

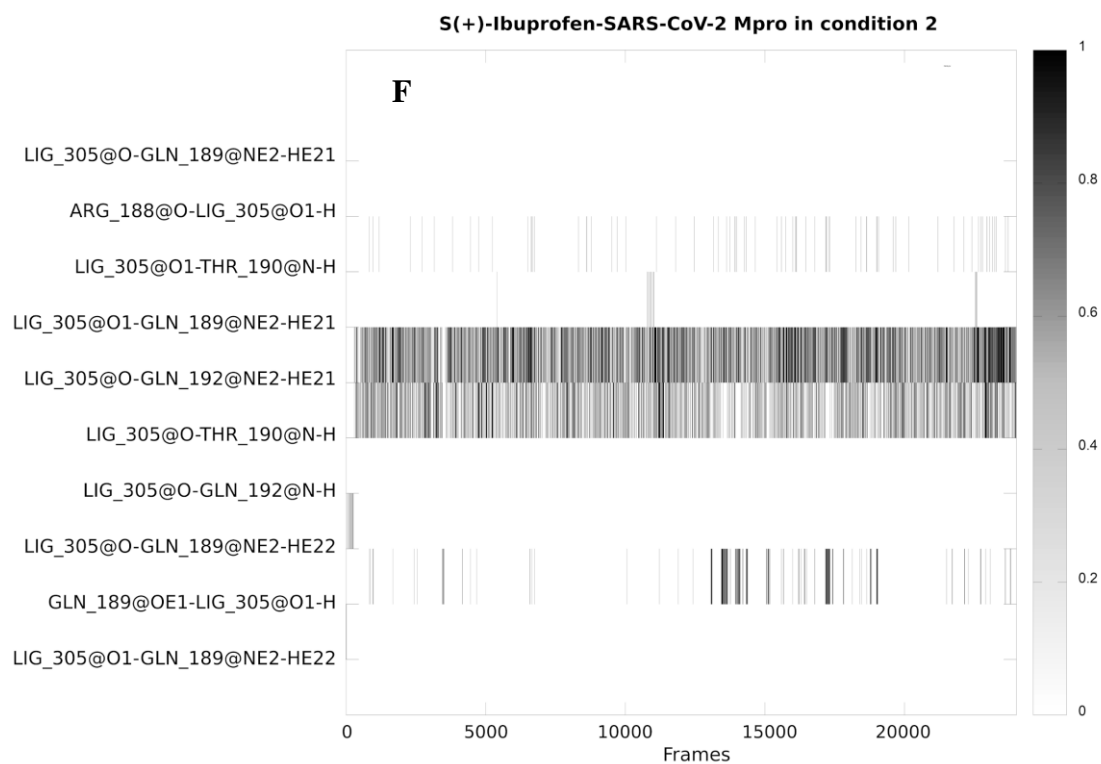

**Figure S2. F.** Hydrogen bonds analysis of complex S(+)-Ibuprofen-SARS-CoV-2 Mpro (red) in condition 2.

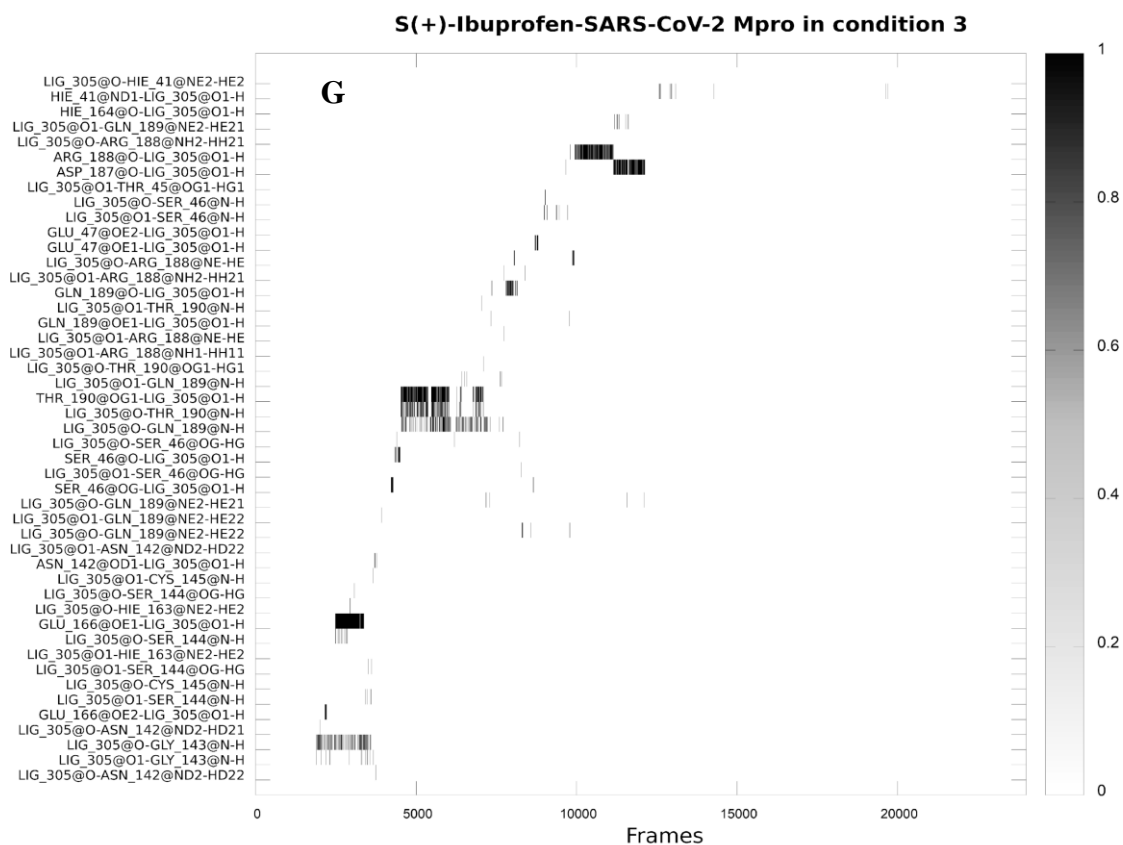

**Figure S2. G.** Hydrogen bonds analysis of complex S(+)-Ibuprofen-SARS-CoV-2 Mpro (red) in condition 3.

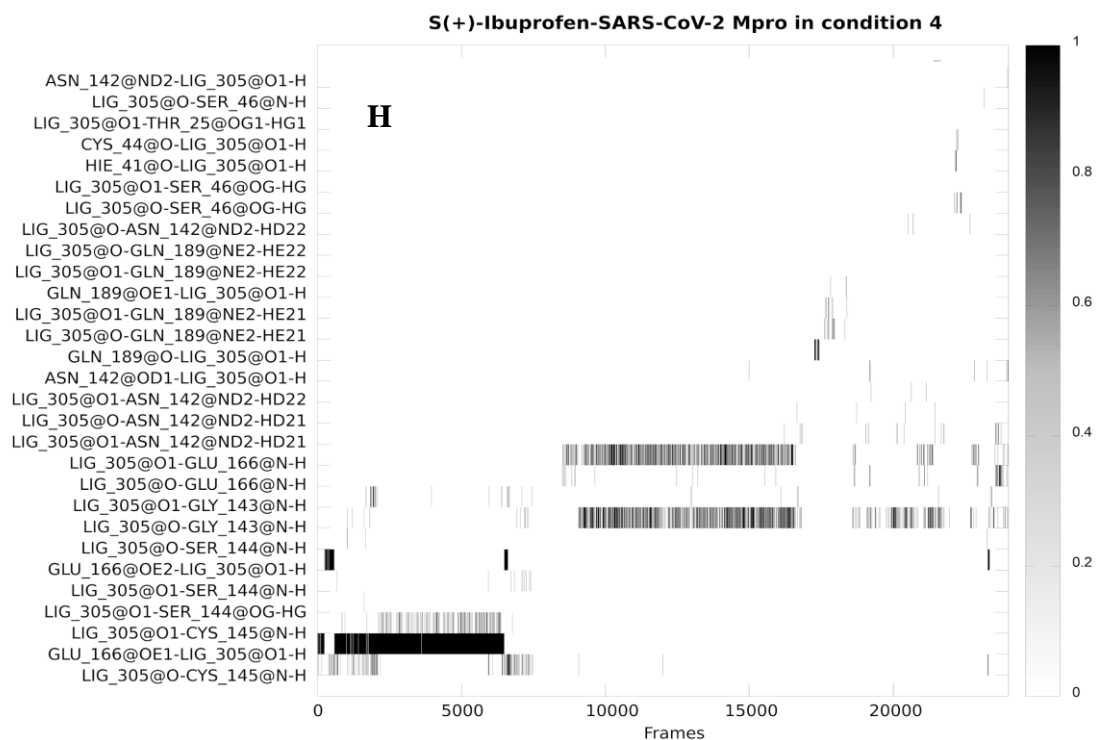

**Figure S2. H.** Hydrogen bonds analysis of complex S(+)-Ibuprofen-SARS-CoV-2 Mpro (red) in condition 4.

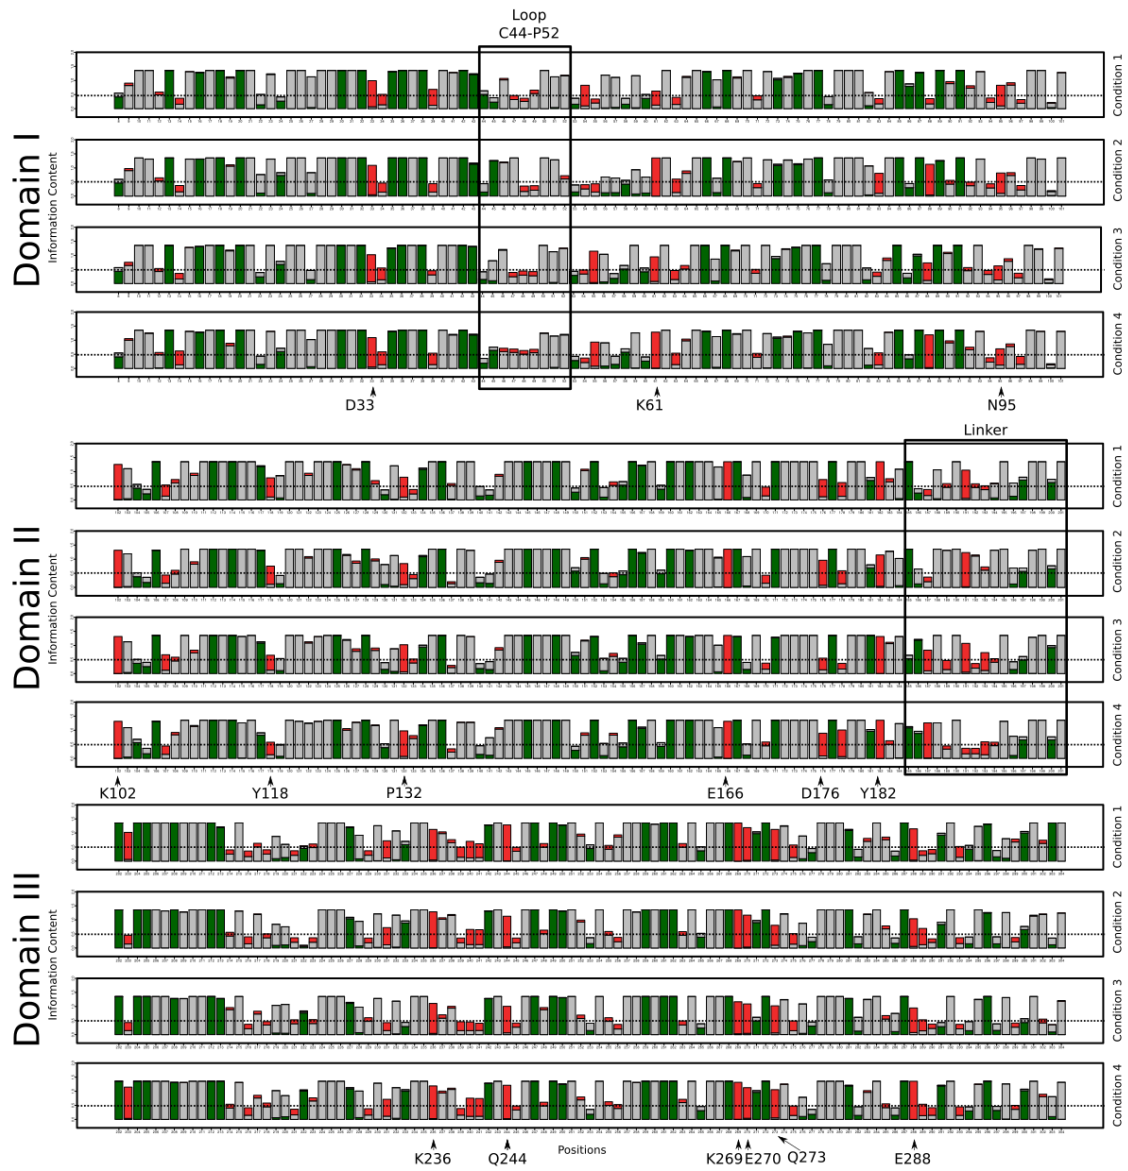

**Figure S3.** Conservation of local frustration for S(+)-Ibuprofen-SARS-CoV-2 Complex for all conditions. For Domain I (in black square the loop C44-P5), Domain II (in black square Linker Loop) and for Domain III. Marked with narrow residues that are highly frustrated and conserved (Information Content (IC) > 0.5) in all conditions. In green minimally frustrated, in red highly frustrated and in grey neutral residues.

**Table S1.** Binding free energies calculated for the complex R(-)Ibuprofen – SARS-CoV-2 Mpro simulated in condition 1 by MM-GBSA method.

| <b>Complex</b>                               |                |                  |                          |
|----------------------------------------------|----------------|------------------|--------------------------|
| <i>Energy Component</i>                      | <i>Average</i> | <i>Std. Dev.</i> | <i>Std. Err. of Mean</i> |
| VDWAALS                                      | -2401.3061     | 23.1143          | 3.2366                   |
| EEL                                          | -21360.1179    | 55.7635          | 7.8085                   |
| EGB                                          | -2944.3908     | 37.5106          | 5.2525                   |
| ESURF                                        | 103.2904       | 1.2083           | 0.1692                   |
| G gas                                        | -3599.0244     | 66.6270          | 9.3297                   |
| G solv                                       | -2841.1004     | 37.1690          | 5.2047                   |
| TOTAL                                        | -6440.1248     | 48.4155          | 6.7795                   |
| <b>Receptor</b>                              |                |                  |                          |
| <i>Energy Component</i>                      | <i>Average</i> | <i>Std. Dev.</i> | <i>Std. Err. of Mean</i> |
| VDWAALS                                      | -2376.0433     | 23.1540          | 3.2422                   |
| EEL                                          | -21345.7716    | 55.7312          | 7.8039                   |
| EGB                                          | -2954.1779     | 37.9157          | 5.3093                   |
| ESURF                                        | 103.7456       | 1.2696           | 0.1778                   |
| G gas                                        | -3561.4529     | 67.5640          | 9.4609                   |
| G solv                                       | 2850.4323      | 37.5444          | 5.2573                   |
| TOTAL                                        | -6411.8852     | 48.9448          | 6.8536                   |
| <b>Ligand</b>                                |                |                  |                          |
| <i>Energy Component</i>                      | <i>Average</i> | <i>Std. Dev.</i> | <i>Std. Err. of Mean</i> |
| VDWAALS                                      | -1.6778        | 0.7957           | 0.1114                   |
| EEL                                          | 0.9678         | 0.6609           | 0.0925                   |
| EGB                                          | -10.7312       | 0.5784           | 0.0810                   |
| ESURF                                        | 2.7462         | 0.0193           | 0.0027                   |
| G gas                                        | 1.3280         | 3.6724           | 0.5142                   |
| G solv                                       | -7.9850        | 0.5728           | 0.0802                   |
| TOTAL                                        | -6.6570        | 3.7177           | 0.5206                   |
| <b>Differences (Complex-Receptor-Ligand)</b> |                |                  |                          |

|                 |          |        |        |
|-----------------|----------|--------|--------|
| VDWAALS         | -23.5850 | 2.8254 | 0.3956 |
| EEL             | -15.3141 | 2.4270 | 0.3398 |
| EGB             | 20.5182  | 1.2301 | 0.1723 |
| ESURF           | -3.2014  | 0.1840 | 0.0258 |
| $\Delta G$ gas  | -38.8994 | 2.4028 | 0.3365 |
| $\Delta G$ solv | 17.3169  | 1.2057 | 0.1688 |
| $\Delta$ TOTAL  | -21.5825 | 1.8585 | 0.2602 |

**Table S2.** Binding free energies calculated for the complex R(-)Ibuprofen – SARS-CoV-2 Mpro simulated in condition 1 by MM-PBSA method.

| <b>Complex</b>          |                |                  |                          |
|-------------------------|----------------|------------------|--------------------------|
| <i>Energy Component</i> | <i>Average</i> | <i>Std. Dev.</i> | <i>Std. Err. of Mean</i> |
| VDWAALS                 | -2401.3061     | 23.1143          | 3.2366                   |
| EEL                     | -21360.1179    | 55.7635          | 7.8085                   |
| EPB                     | -2833.8425     | 37.4701          | 5.2469                   |
| ENPOLAR                 | 73.1556        | 0.5735           | 0.0803                   |
| G gas                   | -3599.0244     | 66.6270          | 9.3297                   |
| G solv                  | -2760.6869     | 37.2166          | 5.2114                   |
| TOTAL                   | -6359.7113     | 47.5589          | 6.6596                   |
| <b>Receptor</b>         |                |                  |                          |
| <i>Energy Component</i> | <i>Average</i> | <i>Std. Dev.</i> | <i>Std. Err. of Mean</i> |
| VDWAALS                 | -2376.0433     | 23.1540          | 3.2422                   |
| EEL                     | -21345.7716    | 55.7312          | 7.8039                   |
| EPB                     | -2842.5031     | 37.6369          | 5.2702                   |
| ENPOLAR                 | 73.5228        | 0.5812           | 0.0814                   |
| G gas                   | -3561.4529     | 67.5640          | 9.4609                   |
| G solv                  | -2768.9803     | 37.3743          | 5.2335                   |
| TOTAL                   | -6330.4331     | 48.1462          | 6.7418                   |
| <b>Ligand</b>           |                |                  |                          |
| <i>Energy Component</i> | <i>Average</i> | <i>Std. Dev.</i> | <i>Std. Err. of Mean</i> |

|                                              |          |        |        |
|----------------------------------------------|----------|--------|--------|
| VDWAALS                                      | -1.6778  | 0.7957 | 0.1114 |
| EEL                                          | 0.9678   | 0.6609 | 0.0925 |
| EPB                                          | -11.0840 | 0.5701 | 0.0798 |
| ENPOLAR                                      | 2.2714   | 0.0195 | 0.0027 |
| G gas                                        | 1.3280   | 3.6724 | 0.5142 |
| G solv                                       | -8.8127  | 0.5624 | 0.0788 |
| TOTAL                                        | -7.4847  | 3.6908 | 0.5168 |
| <b>Differences (Complex-Receptor-Ligand)</b> |          |        |        |
| VDWAALS                                      | -23.5850 | 2.8254 | 0.3956 |
| EEL                                          | -15.3141 | 2.4270 | 0.3398 |
| EPB                                          | 19.7446  | 1.3211 | 0.1850 |
| ENPOLAR                                      | -2.6385  | 0.0914 | 0.0128 |
| $\Delta G$ gas                               | -38.8994 | 2.4028 | 0.3365 |
| $\Delta G$ solv                              | 17.1060  | 1.2972 | 0.1816 |
| $\Delta$ TOTAL                               | -21.7934 | 2.1582 | 0.3022 |

**Table S3.** Binding free energies calculated for the complex R(-)Ibuprofen – SARS-CoV-2 Mpro simulated in condition 2 by MM-GBSA method.

| <b>Complex</b>          |                |                  |                          |
|-------------------------|----------------|------------------|--------------------------|
| <i>Energy Component</i> | <i>Average</i> | <i>Std. Dev.</i> | <i>Std. Err. of Mean</i> |
| VDWAALS                 | -2381.1332     | 19.8575          | 2.7806                   |
| EEL                     | -21314.8883    | 42.1245          | 5.8986                   |
| EGB                     | -3029.9515     | 34.2878          | 4.8013                   |
| ESURF                   | 103.9653       | 1.4620           | 0.2047                   |
| G gas                   | -3500.7110     | 54.4519          | 7.6248                   |
| G solv                  | -2925.9862     | 33.5476          | 4.6976                   |
| TOTAL                   | -6426.6972     | 45.2404          | 6.3349                   |
| <b>Receptor</b>         |                |                  |                          |
| <i>Energy Component</i> | <i>Average</i> | <i>Std. Dev.</i> | <i>Std. Err. of Mean</i> |



|                                              |                |                  |                          |
|----------------------------------------------|----------------|------------------|--------------------------|
| VDWAALS                                      | -2349.9444     | 19.3285          | 2.7065                   |
| EEL                                          | -21299.2816    | 42.0293          | 5.8853                   |
| EGB                                          | -3041.9099     | 34.3082          | 4.8041                   |
| ESURF                                        | 104.9811       | 1.4289           | 0.2001                   |
| G gas                                        | -3454.5414     | 54.0110          | 7.5631                   |
| G solv                                       | -2936.9289     | 33.6416          | 4.7108                   |
| TOTAL                                        | -6391.4703     | 45.1472          | 6.3219                   |
| <b>Ligand</b>                                |                |                  |                          |
| <i>Energy Component</i>                      | <i>Average</i> | <i>Std. Dev.</i> | <i>Std. Err. of Mean</i> |
| VDWAALS                                      | -1.9889        | 0.5331           | 0.0747                   |
| EEL                                          | 0.9958         | 0.4898           | 0.0686                   |
| EGB                                          | -10.5626       | 0.4749           | 0.0665                   |
| ESURF                                        | 2.7417         | 0.0173           | 0.0024                   |
| G gas                                        | -0.3672        | 3.9447           | 0.5524                   |
| G solv                                       | -7.8208        | 0.4764           | 0.0667                   |
| TOTAL                                        | -8.1880        | 3.8824           | 0.5436                   |
| <b>Differences (Complex-Receptor-Ligand)</b> |                |                  |                          |
| VDWAALS                                      | -29.1999       | 2.3350           | 0.3270                   |
| EEL                                          | -16.6026       | 2.4385           | 0.3415                   |
| EGB                                          | 22.5210        | 1.3405           | 0.1877                   |
| ESURF                                        | -3.7575        | 0.1633           | 0.0229                   |
| $\Delta G$ gas                               | -45.8023       | 2.4673           | 0.3455                   |
| $\Delta G$ solv                              | 18.7635        | 1.3401           | 0.1877                   |
| $\Delta$ TOTAL                               | -27.0388       | 1.9960           | 0.2795                   |

**Table S4.** Binding free energies calculated for the complex R(-)Ibuprofen – SARS-CoV-2 Mpro simulated in condition 2 by MM-PBSA method.

| <b>Complex</b>          |                |                  |                          |
|-------------------------|----------------|------------------|--------------------------|
| <i>Energy Component</i> | <i>Average</i> | <i>Std. Dev.</i> | <i>Std. Err. of Mean</i> |
| VDWAALS                 | -2381.1332     | 19.8575          | 2.7806                   |

|                                              |                |                  |                          |
|----------------------------------------------|----------------|------------------|--------------------------|
| EEL                                          | -21314.8883    | 42.1245          | 5.8986                   |
| EPB                                          | -2914.6439     | 33.4723          | 4.6871                   |
| ENPOLAR                                      | 73.7691        | 0.6080           | 0.0851                   |
| G gas                                        | -3500.7110     | 54.4519          | 7.6248                   |
| G solv                                       | -2840.8748     | 33.2083          | 4.6501                   |
| TOTAL                                        | -6341.5858     | 48.2244          | 6.7528                   |
| <b>Receptor</b>                              |                |                  |                          |
| <i>Energy Component</i>                      | <i>Average</i> | <i>Std. Dev.</i> | <i>Std. Err. of Mean</i> |
| VDWAALS                                      | -2349.9444     | 19.3285          | 2.7065                   |
| EEL                                          | -21299.2816    | 42.0293          | 5.8853                   |
| EPB                                          | -2925.9303     | 33.5313          | 4.6953                   |
| ENPOLAR                                      | 74.2385        | 0.5885           | 0.0824                   |
| G gas                                        | -3454.5414     | 54.0110          | 7.5631                   |
| G solv                                       | -2851.6918     | 33.2863          | 4.6610                   |
| TOTAL                                        | -6306.2333     | 48.3500          | 6.7703                   |
| <b>Ligand</b>                                |                |                  |                          |
| <i>Energy Component</i>                      | <i>Average</i> | <i>Std. Dev.</i> | <i>Std. Err. of Mean</i> |
| VDWAALS                                      | -1.9889        | 0.5331           | 0.0747                   |
| EEL                                          | 0.9958         | 0.4898           | 0.0686                   |
| EPB                                          | -10.7464       | 0.4485           | 0.0628                   |
| ENPOLAR                                      | 2.2806         | 0.0157           | 0.0022                   |
| G gas                                        | -0.3672        | 3.9447           | 0.5524                   |
| G solv                                       | -8.4659        | 0.4440           | 0.0622                   |
| TOTAL                                        | -8.8331        | 3.8671           | 0.5415                   |
| <b>Differences (Complex-Receptor-Ligand)</b> |                |                  |                          |
| VDWAALS                                      | -29.1999       | 2.3350           | 0.3270                   |
| EEL                                          | -16.6026       | 2.4385           | 0.3415                   |
| EPB                                          | 22.0329        | 1.2894           | 0.1805                   |
| ENPOLAR                                      | -2.7499        | 0.0839           | 0.0117                   |

|                           |          |        |        |
|---------------------------|----------|--------|--------|
| $\Delta G_{\text{gas}}$   | -45.8023 | 2.4673 | 0.3455 |
| $\Delta G_{\text{solv}}$  | 19.2829  | 1.2770 | 0.1788 |
| $\Delta G_{\text{TOTAL}}$ | -26.5194 | 2.0926 | 0.2930 |

**Table S5.** Binding free energies calculated for the complex R(-)Ibuprofen – SARS-CoV-2 Mpro simulated in condition 3 by MM-GBSA method.

| <b>Complex</b>          |                |                  |                          |
|-------------------------|----------------|------------------|--------------------------|
| <i>Energy Component</i> | <i>Average</i> | <i>Std. Dev.</i> | <i>Std. Err. of Mean</i> |
| VDWAALS                 | -2403.0240     | 19.6297          | 2.7487                   |
| EEL                     | -21115.9582    | 52.3429          | 7.3295                   |
| EGB                     | -3270.0650     | 36.3508          | 5.0901                   |
| ESURF                   | 105.3021       | 0.9352           | 0.1309                   |
| G gas                   | -3262.6962     | 56.0906          | 7.8543                   |
| G solv                  | -3164.7629     | 36.0843          | 5.0528                   |
| TOTAL                   | -6427.4591     | 39.5787          | 5.5421                   |
| <b>Receptor</b>         |                |                  |                          |
| <i>Energy Component</i> | <i>Average</i> | <i>Std. Dev.</i> | <i>Std. Err. of Mean</i> |
| VDWAALS                 | -2370.2984     | 19.6732          | 2.7548                   |
| EEL                     | -21107.0080    | 52.0591          | 7.2897                   |
| EGB                     | -3279.6502     | 36.3013          | 5.0832                   |
| ESURF                   | 106.3524       | 0.9134           | 0.1279                   |
| G gas                   | -3222.8685     | 56.6908          | 7.9383                   |
| G solv                  | -3173.2978     | 36.0556          | 5.0488                   |
| TOTAL                   | -6396.1663     | 39.9966          | 5.6006                   |
| <b>Ligand</b>           |                |                  |                          |
| <i>Energy Component</i> | <i>Average</i> | <i>Std. Dev.</i> | <i>Std. Err. of Mean</i> |
| VDWAALS                 | -1.9388        | 0.5936           | 0.0831                   |
| EEL                     | 1.5659         | 0.5458           | 0.0764                   |
| EGB                     | -11.1893       | 0.5300           | 0.0742                   |
| ESURF                   | 2.7427         | 0.0215           | 0.0030                   |

|                                              |          |        |        |
|----------------------------------------------|----------|--------|--------|
| G gas                                        | 1.4788   | 4.0013 | 0.5603 |
| G solv                                       | -8.4466  | 0.5288 | 0.0740 |
| TOTAL                                        | -6.9678  | 3.8919 | 0.5450 |
| <b>Differences (Complex-Receptor-Ligand)</b> |          |        |        |
| VDWAALS                                      | -30.7868 | 2.7071 | 0.3791 |
| EEL                                          | -10.5161 | 4.5740 | 0.6405 |
| EGB                                          | 20.7745  | 2.8537 | 0.3996 |
| ESURF                                        | -3.7930  | 0.1763 | 0.0247 |
| $\Delta G$ gas                               | -41.3064 | 3.8482 | 0.5389 |
| $\Delta G$ solv                              | 16.9815  | 2.8347 | 0.3969 |
| $\Delta$ TOTAL                               | -24.3249 | 1.7928 | 0.2510 |

**Table S6.** Binding free energies calculated for the complex R(-)Ibuprofen – SARS-CoV-2 Mpro simulated in condition 3 by MM-PBSA method.

| <b>Complex</b>          |                |                  |                          |
|-------------------------|----------------|------------------|--------------------------|
| <i>Energy Component</i> | <i>Average</i> | <i>Std. Dev.</i> | <i>Std. Err. of Mean</i> |
| VDWAALS                 | -2403.0240     | 19.6297          | 2.7487                   |
| EEL                     | -21115.9582    | 52.3429          | 7.3295                   |
| EPB                     | -3152.6152     | 36.1080          | 5.0561                   |
| ENPOLAR                 | 74.3742        | 0.4507           | 0.0631                   |
| G gas                   | -3262.6962     | 56.0906          | 7.8543                   |
| G solv                  | -3078.2410     | 35.9396          | 5.0326                   |
| TOTAL                   | -6340.9372     | 41.4907          | 5.8099                   |
| <b>Receptor</b>         |                |                  |                          |
| <i>Energy Component</i> | <i>Average</i> | <i>Std. Dev.</i> | <i>Std. Err. of Mean</i> |
| VDWAALS                 | -2370.2984     | 19.6732          | 2.7548                   |
| EEL                     | -21107.0080    | 52.0591          | 7.2897                   |
| EPB                     | -3162.8371     | 36.3370          | 5.0882                   |
| ENPOLAR                 | 75.0052        | 0.4400           | 0.0616                   |
| G gas                   | -3222.8685     | 56.6908          | 7.9383                   |

|                                              |                |                  |                          |
|----------------------------------------------|----------------|------------------|--------------------------|
| G solv                                       | -3087.8319     | 36.1635          | 5.0639                   |
| TOTAL                                        | -6310.7005     | 41.6778          | 5.8361                   |
| <b>Ligand</b>                                |                |                  |                          |
| <i>Energy Component</i>                      | <i>Average</i> | <i>Std. Dev.</i> | <i>Std. Err. of Mean</i> |
| VDWAALS                                      | -1.9388        | 0.5936           | 0.0831                   |
| EEL                                          | 1.5659         | 0.5458           | 0.0764                   |
| EPB                                          | -11.7394       | 0.5678           | 0.0795                   |
| ENPOLAR                                      | 2.2671         | 0.0153           | 0.0021                   |
| G gas                                        | 1.4788         | 4.0013           | 0.5603                   |
| G solv                                       | -9.4722        | 0.5663           | 0.0793                   |
| TOTAL                                        | -7.9935        | 3.8390           | 0.5376                   |
| <b>Differences (Complex-Receptor-Ligand)</b> |                |                  |                          |
| VDWAALS                                      | -30.7868       | 2.7071           | 0.3791                   |
| EEL                                          | -10.5161       | 4.5740           | 0.6405                   |
| EPB                                          | 21.9613        | 2.8924           | 0.4050                   |
| ENPOLAR                                      | -2.8981        | 0.0836           | 0.0117                   |
| $\Delta G$ gas                               | -41.3064       | 3.8482           | 0.5389                   |
| $\Delta G$ solv                              | 19.0631        | 2.8884           | 0.4045                   |
| $\Delta$ TOTAL                               | -22.2433       | 2.4110           | 0.3376                   |

**Table S7.** Binding free energies calculated for the complex R(-)Ibuprofen – SARS-CoV-2 Mpro simulated in condition 4 by MM-GBSA method.

| <b>Complex</b>          |                |                  |                          |
|-------------------------|----------------|------------------|--------------------------|
| <i>Energy Component</i> | <i>Average</i> | <i>Std. Dev.</i> | <i>Std. Err. of Mean</i> |
| VDWAALS                 | -2386.8998     | 20.8697          | 2.9223                   |
| EEL                     | -21243.7226    | 52.1246          | 7.2989                   |
| EGB                     | -3098.1953     | 35.6429          | 4.9910                   |
| ESURF                   | 103.8716       | 1.2289           | 0.1721                   |
| G gas                   | -3449.5145     | 62.2510          | 8.7169                   |
| G solv                  | -2994.3237     | 35.4253          | 4.9605                   |

|                                              |                |                  |                          |
|----------------------------------------------|----------------|------------------|--------------------------|
| TOTAL                                        | -6443.8382     | 48.7299          | 6.8236                   |
| <b>Receptor</b>                              |                |                  |                          |
| <i>Energy Component</i>                      | <i>Average</i> | <i>Std. Dev.</i> | <i>Std. Err. of Mean</i> |
| VDWAALS                                      | -2356.6114     | 20.4300          | 2.8608                   |
| EEL                                          | -21235.6785    | 51.5943          | 7.2247                   |
| EGB                                          | -3104.7177     | 35.4189          | 4.9596                   |
| ESURF                                        | 104.7370       | 1.2473           | 0.1747                   |
| G gas                                        | -3415.4207     | 62.4258          | 8.7414                   |
| G solv                                       | -2999.9807     | 35.1972          | 4.9286                   |
| TOTAL                                        | -6415.4013     | 48.8811          | 6.8447                   |
| <b>Ligand</b>                                |                |                  |                          |
| <i>Energy Component</i>                      | <i>Average</i> | <i>Std. Dev.</i> | <i>Std. Err. of Mean</i> |
| VDWAALS                                      | -2.1073        | 0.5935           | 0.0831                   |
| EEL                                          | 1.6284         | 0.8884           | 0.1244                   |
| EGB                                          | -16.3677       | 0.6151           | 0.0861                   |
| ESURF                                        | 2.7303         | 0.0242           | 0.0034                   |
| G gas                                        | 3.7594         | 3.1690           | 0.4437                   |
| G solv                                       | -13.6374       | 0.6065           | 0.0849                   |
| TOTAL                                        | -9.8781        | 3.1600           | 0.4425                   |
| <b>Differences (Complex-Receptor-Ligand)</b> |                |                  |                          |
| VDWAALS                                      | -28.1812       | 1.9857           | 0.2781                   |
| EEL                                          | -9.6724        | 5.1068           | 0.7151                   |
| EGB                                          | 22.8901        | 4.1242           | 0.5775                   |
| ESURF                                        | -3.5957        | 0.1037           | 0.0145                   |
| $\Delta G$ gas                               | -37.8532       | 4.8168           | 0.6745                   |
| $\Delta G$ solv                              | 19.2944        | 4.1341           | 0.5789                   |
| $\Delta$ TOTAL                               | -18.5589       | 2.0213           | 0.2830                   |

**Table S8.** Binding free energies calculated for the complex R(-)Ibuprofen – SARS-CoV-2 Mpro simulated in condition 4 by MM-PBSA method.

| <b>Complex</b>                               |                |                  |                          |
|----------------------------------------------|----------------|------------------|--------------------------|
| <i>Energy Component</i>                      | <i>Average</i> | <i>Std. Dev.</i> | <i>Std. Err. of Mean</i> |
| VDWAALS                                      | -2386.8998     | 20.8697          | 2.9223                   |
| EEL                                          | -21243.7226    | 52.1246          | 7.2989                   |
| EPB                                          | -2971.1614     | 30.7084          | 4.3000                   |
| ENPOLAR                                      | 73.3307        | 0.5765           | 0.0807                   |
| G gas                                        | -3449.5145     | 62.2510          | 8.7169                   |
| G solv                                       | -2897.8307     | 30.4695          | 4.2666                   |
| TOTAL                                        | -6347.3453     | 49.7766          | 6.9701                   |
| <b>Receptor</b>                              |                |                  |                          |
| <i>Energy Component</i>                      | <i>Average</i> | <i>Std. Dev.</i> | <i>Std. Err. of Mean</i> |
| VDWAALS                                      | -2356.6114     | 20.4300          | 2.8608                   |
| EEL                                          | -21235.6785    | 51.5943          | 7.2247                   |
| EPB                                          | -2977.4978     | 30.5592          | 4.2791                   |
| ENPOLAR                                      | 73.8774        | 0.5708           | 0.0799                   |
| G gas                                        | -3415.4207     | 62.4258          | 8.7414                   |
| G solv                                       | -2903.6203     | 30.3229          | 4.2461                   |
| TOTAL                                        | -6319.0410     | 49.9289          | 6.9914                   |
| <b>Ligand</b>                                |                |                  |                          |
| <i>Energy Component</i>                      | <i>Average</i> | <i>Std. Dev.</i> | <i>Std. Err. of Mean</i> |
| VDWAALS                                      | -2.1073        | 0.5935           | 0.0831                   |
| EEL                                          | 1.6284         | 0.8884           | 0.1244                   |
| EPB                                          | -16.9258       | 0.6599           | 0.0924                   |
| ENPOLAR                                      | 2.2620         | 0.0172           | 0.0024                   |
| G gas                                        | 3.7594         | 3.1690           | 0.4437                   |
| G solv                                       | -14.6638       | 0.6582           | 0.0922                   |
| TOTAL                                        | -10.9044       | 3.1081           | 0.4352                   |
| <b>Differences (Complex-Receptor-Ligand)</b> |                |                  |                          |

|                 |          |        |        |
|-----------------|----------|--------|--------|
| VDWAALS         | -28.1812 | 1.9857 | 0.2781 |
| EEL             | -9.6724  | 5.1068 | 0.7151 |
| EPB             | 23.2621  | 3.7915 | 0.5309 |
| ENPOLAR         | -2.8087  | 0.0491 | 0.0069 |
| $\Delta G$ gas  | -37.8532 | 4.8168 | 0.6745 |
| $\Delta G$ solv | 20.4534  | 3.7857 | 0.5301 |
| $\Delta$ TOTAL  | -17.3998 | 2.5163 | 0.3523 |
|                 |          |        |        |

**Table S9.** Binding free energies calculated for the complex S(+)-Ibuprofen – SARS-CoV-2 Mpro simulated in condition 1 by MM-GBSA method.

| <b>Complex</b>          |                |                  |                          |
|-------------------------|----------------|------------------|--------------------------|
| <i>Energy Component</i> | <i>Average</i> | <i>Std. Dev.</i> | <i>Std. Err. of Mean</i> |
| VDWAALS                 | -2407.3698     | 20.3433          | 2.8486                   |
| EEL                     | -21348.7208    | 45.3135          | 6.3452                   |
| EGB                     | -3044.4981     | 34.9853          | 4.8989                   |
| ESURF                   | 103.1701       | 1.2257           | 0.1716                   |
| G gas                   | -3511.8581     | 66.3808          | 9.2952                   |
| G solv                  | -2941.3281     | 34.4764          | 4.8277                   |
| TOTAL                   | -6453.1862     | 52.7564          | 7.3874                   |
| <b>Receptor</b>         |                |                  |                          |
| <i>Energy Component</i> | <i>Average</i> | <i>Std. Dev.</i> | <i>Std. Err. of Mean</i> |
| VDWAALS                 | -2381.5010     | 20.3595          | 2.8509                   |
| EEL                     | -21340.4548    | 44.9162          | 6.2895                   |
| EGB                     | -3047.9555     | 34.9745          | 4.8974                   |
| ESURF                   | 103.8100       | 1.2186           | 0.1706                   |
| G gas                   | -3482.1059     | 64.7230          | 9.0630                   |
| G solv                  | -2944.1455     | 34.4822          | 4.8285                   |
| TOTAL                   | -6426.2514     | 51.0088          | 7.142                    |
| <b>Ligand</b>           |                |                  |                          |



| <i>Energy Component</i>                      | <i>Average</i> | <i>Std. Dev.</i> | <i>Std. Err. of Mean</i> |
|----------------------------------------------|----------------|------------------|--------------------------|
| VDWAALS                                      | -1.9343        | 0.6565           | 0.0919                   |
| EEL                                          | 1.9962         | 1.2541           | 0.1756                   |
| EGB                                          | 16.9413        | 0.9593           | 0.1343                   |
| ESURF                                        | 2.7358         | 0.0169           | 0.0024                   |
| G gas                                        | 4.4422         | 3.6755           | 0.5147                   |
| G solv                                       | -14.2055       | 0.9538           | 0.1336                   |
| TOTAL                                        | -9.7633        | 3.6608           | 0.5126                   |
| <b>Differences (Complex-Receptor-Ligand)</b> |                |                  |                          |
| VDWAALS                                      | -23.9345       | 1.5096           | 0.2114                   |
| EEL                                          | -10.2622       | 2.2649           | 0.3171                   |
| EGB                                          | 20.3986        | 1.8411           | 0.2578                   |
| ESURF                                        | -3.3757        | 0.1478           | 0.0207                   |
| $\Delta G$ gas                               | -34.1944       | 2.6647           | 0.3731                   |
| $\Delta G$ solv                              | 17.0229        | 1.8260           | 0.2557                   |
| $\Delta$ TOTAL                               | -17.1715       | 1.6315           | 0.2284                   |

**Table S10.** Binding free energies calculated for the complex S(+)-Ibuprofen – SARS-CoV-2 Mpro simulated in condition 1 by MM-PBSA method.

| <b>Complex</b>          |                |                  |                          |
|-------------------------|----------------|------------------|--------------------------|
| <i>Energy Component</i> | <i>Average</i> | <i>Std. Dev.</i> | <i>Std. Err. of Mean</i> |
| VDWAALS                 | -2407.3698     | 20.3433          | 2.8486                   |
| EEL                     | -21348.7208    | 45.3135          | 6.3452                   |
| EPB                     | -2904.2903     | 36.8351          | 5.1580                   |
| ENPOLAR                 | 73.3022        | 0.5592           | 0.0783                   |
| G gas                   | -3511.8581     | 66.3808          | 9.2952                   |
| G solv                  | -2830.9880     | 36.5560          | 5.1189                   |
| TOTAL                   | -6342.8461     | 50.7277          | 7.1033                   |
| <b>Receptor</b>         |                |                  |                          |
| <i>Energy Component</i> | <i>Average</i> | <i>Std. Dev.</i> | <i>Std. Err. of Mean</i> |

|                                              |                |                  |                          |
|----------------------------------------------|----------------|------------------|--------------------------|
| VDWAALS                                      | -2381.5010     | 20.3595          | 2.8509                   |
| EEL                                          | -21340.4548    | 44.9162          | 6.2895                   |
| EPB                                          | -2906.7086     | 36.8009          | 5.1532                   |
| ENPOLAR                                      | 73.7711        | 0.5449           | 0.0763                   |
| G gas                                        | -3482.1059     | 64.7230          | 9.0630                   |
| G solv                                       | -2832.9375     | 36.5187          | 5.1136                   |
| TOTAL                                        | -6315.0434     | 49.3468          | 6.9099                   |
| <b>Ligand</b>                                |                |                  |                          |
| <i>Energy Component</i>                      | <i>Average</i> | <i>Std. Dev.</i> | <i>Std. Err. of Mean</i> |
| VDWAALS                                      | -1.9343        | 0.6565           | 0.0919                   |
| EEL                                          | 1.9962         | 1.2541           | 0.1756                   |
| EPB                                          | -17.5291       | 0.9939           | 0.1392                   |
| ENPOLAR                                      | 2.2555         | 0.0142           | 0.0020                   |
| G gas                                        | 4.4422         | 3.6755           | 0.5147                   |
| G solv                                       | -15.2736       | 0.9918           | 0.1389                   |
| TOTAL                                        | -10.8314       | 3.6545           | 0.5117                   |
| <b>Differences (Complex-Receptor-Ligand)</b> |                |                  |                          |
| VDWAALS                                      | -23.9345       | 1.5096           | 0.2114                   |
| EEL                                          | -10.2622       | 2.2649           | 0.3171                   |
| EPB                                          | 19.9474        | 2.2080           | 0.3092                   |
| ENPOLAR                                      | -2.7243        | 0.0659           | 0.0092                   |
| $\Delta G$ gas                               | -34.1944       | 2.6647           | 0.3731                   |
| $\Delta G$ solv                              | 17.2230        | 2.2127           | 0.3098                   |
| $\Delta$ TOTAL                               | -16.9713       | 1.8023           | 0.2524                   |

**Table S11.** Binding free energies calculated for the complex S(+)-Ibuprofen – SARS-CoV-2 Mpro simulated in condition 2 by MM-GBSA method.

| <b>Complex</b>          |                |                  |                          |
|-------------------------|----------------|------------------|--------------------------|
| <i>Energy Component</i> | <i>Average</i> | <i>Std. Dev.</i> | <i>Std. Err. of Mean</i> |
| VDWAALS                 | -2432.0188     | 20.6643          | 2.8936                   |

|                                              |                |                  |                          |
|----------------------------------------------|----------------|------------------|--------------------------|
| EEL                                          | -21376.1770    | 89.7023          | 12.5608                  |
| EGB                                          | -2882.2061     | 52.9053          | 7.4082                   |
| ESURF                                        | 101.6505       | 1.2601           | 0.1764                   |
| G gas                                        | -3680.8533     | 80.6695          | 11.2960                  |
| G solv                                       | -2780.5556     | 52.3109          | 7.3250                   |
| TOTAL                                        | -6461.4089     | 53.9353          | 7.5525                   |
| <b>Receptor</b>                              |                |                  |                          |
| <i>Energy Component</i>                      | <i>Average</i> | <i>Std. Dev.</i> | <i>Std. Err. of Mean</i> |
| VDWAALS                                      | -2396.5576     | 21.0033          | 2.9410                   |
| EEL                                          | -21358.4507    | 90.6579          | 12.6946                  |
| EGB                                          | -2895.4347     | 53.7095          | 7.5208                   |
| ESURF                                        | 103.1093       | 1.2867           | 0.1802                   |
| G gas                                        | -3633.3619     | 82.4560          | 11.5462                  |
| G solv                                       | -2792.3254     | 53.0841          | 7.4333                   |
| TOTAL                                        | -6425.6873     | 54.2354          | 7.5945                   |
| <b>Ligand</b>                                |                |                  |                          |
| <i>Energy Component</i>                      | <i>Average</i> | <i>Std. Dev.</i> | <i>Std. Err. of Mean</i> |
| VDWAALS                                      | -1.7634        | 0.6269           | 0.0878                   |
| EEL                                          | 1.4342         | 0.6703           | 0.0939                   |
| EGB                                          | -16.6506       | 0.5618           | 0.0787                   |
| ESURF                                        | 2.7346         | 0.0208           | 0.0029                   |
| G gas                                        | 5.3654         | 4.0837           | 0.5718                   |
| G solv                                       | -13.9160       | 0.5583           | 0.0782                   |
| TOTAL                                        | -8.5506        | 4.1055           | 0.5749                   |
| <b>Differences (Complex-Receptor-Ligand)</b> |                |                  |                          |
| VDWAALS                                      | -33.6977       | 2.1136           | 0.2960                   |
| EEL                                          | -19.1605       | 3.3188           | 0.4647                   |
| EGB                                          | 29.8792        | 2.3841           | 0.3338                   |
| ESURF                                        | -4.1934        | 0.1062           | 0.0149                   |

|                 |          |        |        |
|-----------------|----------|--------|--------|
| $\Delta G$ gas  | -52.8569 | 3.6918 | 0.5170 |
| $\Delta G$ solv | 25.6858  | 2.3262 | 0.3257 |
| $\Delta$ TOTAL  | -27.1710 | 2.2541 | 0.3156 |

**Table S12.** Binding free energies calculated for the complex S(+)*Ibuprofen* – SARS-CoV-2 Mpro simulated in condition 2 by MM-PBSA method.

| <b>Complex</b>          |                |                  |                          |
|-------------------------|----------------|------------------|--------------------------|
| <i>Energy Component</i> | <i>Average</i> | <i>Std. Dev.</i> | <i>Std. Err. of Mean</i> |
| VDWAALS                 | -2432.0188     | 20.6643          | 2.8936                   |
| EEL                     | -21376.1770    | 89.7023          | 12.5608                  |
| EPB                     | -2761.5640     | 53.2599          | 7.4579                   |
| ENPOLAR                 | 71.8246        | 0.5285           | 0.0740                   |
| G gas                   | -3680.8533     | 80.6695          | 11.2960                  |
| G solv                  | -2689.7394     | 53.0295          | 7.4256                   |
| TOTAL                   | -6370.5927     | 53.8224          | 7.5366                   |
| <b>Receptor</b>         |                |                  |                          |
| <i>Energy Component</i> | <i>Average</i> | <i>Std. Dev.</i> | <i>Std. Err. of Mean</i> |
| VDWAALS                 | -2396.5576     | 21.0033          | 2.9410                   |
| EEL                     | -21358.4507    | 90.6579          | 12.6946                  |
| EPB                     | -2775.1878     | 53.8027          | 7.5339                   |
| ENPOLAR                 | 72.4920        | 0.5339           | 0.0748                   |
| G gas                   | -3633.3619     | 82.4560          | 11.5462                  |
| G solv                  | -2702.6958     | 53.5577          | 7.4996                   |
| TOTAL                   | -6336.0577     | 54.3086          | 7.6047                   |
| <b>Ligand</b>           |                |                  |                          |
| <i>Energy Component</i> | <i>Average</i> | <i>Std. Dev.</i> | <i>Std. Err. of Mean</i> |
| VDWAALS                 | -1.7634        | 0.6269           | 0.0878                   |
| EEL                     | 1.4342         | 0.6703           | 0.0939                   |
| EPB                     | -17.5271       | 0.6285           | 0.0880                   |
| ENPOLAR                 | 2.2517         | 0.0162           | 0.0023                   |

|                                              |          |        |        |
|----------------------------------------------|----------|--------|--------|
| G gas                                        | 5.3654   | 4.0837 | 0.5718 |
| G solv                                       | -15.2754 | 0.6260 | 0.0877 |
| TOTAL                                        | -9.9100  | 4.1130 | 0.5759 |
| <b>Differences (Complex-Receptor-Ligand)</b> |          |        |        |
| VDWAALS                                      | -33.6977 | 2.1136 | 0.2960 |
| EEL                                          | -19.1605 | 3.3188 | 0.4647 |
| EPB                                          | 31.1509  | 2.2017 | 0.3083 |
| ENPOLAR                                      | -2.9191  | 0.0639 | 0.0090 |
| $\Delta G$ gas                               | -52.8569 | 3.6918 | 0.5170 |
| $\Delta G$ solv                              | 28.2319  | 2.1707 | 0.3040 |
| $\Delta$ TOTAL                               | -24.6250 | 2.5289 | 0.3541 |

**Table S13.** Binding free energies calculated for the complex S(+)-Ibuprofen – SARS-CoV-2 Mpro simulated in condition 3 by MM-GBSA method.

| <b>Complex</b>          |                |                  |                          |
|-------------------------|----------------|------------------|--------------------------|
| <i>Energy Component</i> | <i>Average</i> | <i>Std. Dev.</i> | <i>Std. Err. of Mean</i> |
| VDWAALS                 | -2424.5913     | 17.4897          | 2.4491                   |
| EEL                     | -21218.4158    | 69.0588          | 9.6702                   |
| EGB                     | -3029.2366     | 45.4814          | 6.3687                   |
| ESURF                   | 102.5913       | 1.3185           | 0.1846                   |
| G gas                   | -3489.3506     | 72.2005          | 10.1101                  |
| G solv                  | -2926.6453     | 44.9969          | 6.3008                   |
| TOTAL                   | -6415.9959     | 45.3471          | 6.3499                   |
| <b>Receptor</b>         |                |                  |                          |
| <i>Energy Component</i> | <i>Average</i> | <i>Std. Dev.</i> | <i>Std. Err. of Mean</i> |
| VDWAALS                 | -2397.1656     | 17.8039          | 2.4930                   |
| EEL                     | -21214.4935    | 69.3896          | 9.7165                   |
| EGB                     | -3032.1771     | 46.1027          | 6.4557                   |
| ESURF                   | 103.1307       | 1.2707           | 0.1779                   |
| G gas                   | -3464.0718     | 72.5195          | 10.1548                  |

|                                              |                |                  |                          |
|----------------------------------------------|----------------|------------------|--------------------------|
| G solv                                       | -2929.0464     | 45.6061          | 6.3861                   |
| TOTAL                                        | -6393.1182     | 45.2121          | 6.3310                   |
| <b>Ligand</b>                                |                |                  |                          |
| <i>Energy Component</i>                      | <i>Average</i> | <i>Std. Dev.</i> | <i>Std. Err. of Mean</i> |
| VDWAALS                                      | -1.5724        | 0.6024           | 0.0844                   |
| EEL                                          | 3.4487         | 0.6895           | 0.0966                   |
| EGB                                          | -18.5678       | 0.4656           | 0.0652                   |
| ESURF                                        | 2.7532         | 0.0189           | 0.0027                   |
| G gas                                        | 7.9463         | 3.2073           | 0.4491                   |
| G solv                                       | -15.8145       | 0.4636           | 0.0649                   |
| TOTAL                                        | -7.8682        | 3.3253           | 0.4656                   |
| <b>Differences (Complex-Receptor-Ligand)</b> |                |                  |                          |
| VDWAALS                                      | -25.8532       | 1.5725           | 0.2202                   |
| EEL                                          | -7.3710        | 2.3878           | 0.3344                   |
| EGB                                          | 21.5082        | 2.3608           | 0.3306                   |
| ESURF                                        | -3.2926        | 0.1444           | 0.0202                   |
| $\Delta G$ gas                               | -33.2251       | 2.6684           | 0.3737                   |
| $\Delta G$ solv                              | 18.2156        | 2.3231           | 0.3253                   |
| $\Delta$ TOTAL                               | -15.0095       | 1.7316           | 0.2425                   |

**Table S14.** Binding free energies calculated for the complex S(+)-Ibuprofen – SARS-CoV-2 Mpro simulated in condition 3 by MM-PBSA method.

| <b>Complex</b>          |                |                  |                          |
|-------------------------|----------------|------------------|--------------------------|
| <i>Energy Component</i> | <i>Average</i> | <i>Std. Dev.</i> | <i>Std. Err. of Mean</i> |
| VDWAALS                 | -2424.5913     | 17.4897          | 2.4491                   |
| EEL                     | -21218.4158    | 69.0588          | 9.6702                   |
| EPB                     | -2907.3492     | 42.1443          | 5.9014                   |
| ENPOLAR                 | 72.5739        | 0.4846           | 0.0679                   |
| G gas                   | -3489.3506     | 72.2005          | 10.1101                  |
| G solv                  | -2834.7754     | 42.0195          | 5.8839                   |

|                                              |                |                  |                          |
|----------------------------------------------|----------------|------------------|--------------------------|
| TOTAL                                        | -6324.1259     | 47.1150          | 6.5974                   |
| <b>Receptor</b>                              |                |                  |                          |
| <i>Energy Component</i>                      | <i>Average</i> | <i>Std. Dev.</i> | <i>Std. Err. of Mean</i> |
| VDWAALS                                      | -2397.1656     | 17.8039          | 2.4930                   |
| EEL                                          | -21214.4935    | 69.3896          | 9.7165                   |
| EPB                                          | -2910.0192     | 42.7211          | 5.9821                   |
| ENPOLAR                                      | 72.8820        | 0.4791           | 0.0671                   |
| G gas                                        | -3464.0718     | 72.5195          | 10.1548                  |
| G solv                                       | -2837.1372     | 42.5974          | 5.9648                   |
| TOTAL                                        | -6301.2090     | 46.6471          | 6.5319                   |
| <b>Ligand</b>                                |                |                  |                          |
| <i>Energy Component</i>                      | <i>Average</i> | <i>Std. Dev.</i> | <i>Std. Err. of Mean</i> |
| VDWAALS                                      | -1.5724        | 0.6024           | 0.0844                   |
| EEL                                          | 3.4487         | 0.6895           | 0.0966                   |
| EPB                                          | -19.3554       | 0.5098           | 0.0714                   |
| ENPOLAR                                      | 2.2597         | 0.0174           | 0.0024                   |
| G gas                                        | 7.9463         | 3.2073           | 0.4491                   |
| G solv                                       | -17.0957       | 0.5049           | 0.0707                   |
| TOTAL                                        | -9.1493        | 3.3263           | 0.4658                   |
| <b>Differences (Complex-Receptor-Ligand)</b> |                |                  |                          |
| VDWAALS                                      | -25.8532       | 1.5725           | 0.2202                   |
| EEL                                          | -7.3710        | 2.3878           | 0.3344                   |
| EPB                                          | 22.0253        | 2.7939           | 0.3912                   |
| ENPOLAR                                      | -2.5678        | 0.0543           | 0.0076                   |
| $\Delta G$ gas                               | -33.2251       | 2.6684           | 0.3737                   |
| $\Delta G$ solv                              | 19.4575        | 2.7795           | 0.3892                   |
| $\Delta$ TOTAL                               | -13.7676       | 2.3249           | 0.3256                   |

**Table S15.** Binding free energies calculated for the complex S(+)*Ibuprofen* – SARS-CoV-2 Mpro simulated in condition 4 by MM-GBSA method.

| <b>Complex</b>                               |                |                  |                          |
|----------------------------------------------|----------------|------------------|--------------------------|
| <i>Energy Component</i>                      | <i>Average</i> | <i>Std. Dev.</i> | <i>Std. Err. of Mean</i> |
| VDWAALS                                      | -2405.5243     | 21.3879          | 2.9949                   |
| EEL                                          | -21326.2807    | 59.0912          | 8.2744                   |
| EGB                                          | -3103.8243     | 33.2974          | 4.6626                   |
| ESURF                                        | 100.8803       | 1.0701           | 0.1498                   |
| G gas                                        | -3448.9206     | 45.9224          | 6.4304                   |
| G solv                                       | -3002.9440     | 33.1491          | 4.6418                   |
| TOTAL                                        | -6451.8646     | 37.0687          | 5.1907                   |
| <b>Receptor</b>                              |                |                  |                          |
| <i>Energy Component</i>                      | <i>Average</i> | <i>Std. Dev.</i> | <i>Std. Err. of Mean</i> |
| VDWAALS                                      | -2381.8500     | 21.1953          | 2.9679                   |
| EEL                                          | -21303.2624    | 59.0269          | 8.2654                   |
| EGB                                          | -3116.2327     | 33.0394          | 4.6264                   |
| ESURF                                        | 101.4237       | 1.0443           | 0.1462                   |
| G gas                                        | -3407.4180     | 46.8125          | 6.5551                   |
| G solv                                       | -3014.8089     | 32.9089          | 4.6082                   |
| TOTAL                                        | -6422.2269     | 37.8897          | 5.3056                   |
| <b>Ligand</b>                                |                |                  |                          |
| <i>Energy Component</i>                      | <i>Average</i> | <i>Std. Dev.</i> | <i>Std. Err. of Mean</i> |
| VDWAALS                                      | -2.0627        | 0.5401           | 0.0756                   |
| EEL                                          | 1.1780         | 0.7754           | 0.1086                   |
| EGB                                          | -16.6507       | 0.6290           | 0.0881                   |
| ESURF                                        | 2.7322         | 0.0216           | 0.0030                   |
| G gas                                        | 4.3047         | 3.2440           | 0.4542                   |
| G solv                                       | -13.9185       | 0.6217           | 0.0870                   |
| TOTAL                                        | -9.6137        | 3.2010           | 0.4482                   |
| <b>Differences (Complex-Receptor-Ligand)</b> |                |                  |                          |



|                 |          |        |        |
|-----------------|----------|--------|--------|
| VDWAALS         | -21.6116 | 2.2292 | 0.3121 |
| EEL             | -24.1963 | 3.3771 | 0.4729 |
| EGB             | 29.0591  | 2.5435 | 0.3562 |
| ESURF           | -3.2757  | 0.1675 | 0.0234 |
| $\Delta G$ gas  | -45.8074 | 2.5524 | 0.3574 |
| $\Delta G$ solv | 25.7834  | 2.4789 | 0.3471 |
| $\Delta$ TOTAL  | -20.0240 | 1.7041 | 0.2386 |

**Table S16.** Binding free energies calculated for the complex S(+)-Ibuprofen – SARS-CoV-2 Mpro simulated in condition 4 by MM-PBSA method.

| <b>Complex</b>          |                |                  |                          |
|-------------------------|----------------|------------------|--------------------------|
| <i>Energy Component</i> | <i>Average</i> | <i>Std. Dev.</i> | <i>Std. Err. of Mean</i> |
| VDWAALS                 | -2405.5243     | 21.3879          | 2.9949                   |
| EEL                     | -21326.2807    | 59.0912          | 8.2744                   |
| EPB                     | -2980.5891     | 31.8794          | 4.4640                   |
| ENPOLAR                 | 72.2114        | 0.4558           | 0.0638                   |
| G gas                   | -3448.9206     | 45.9224          | 6.4304                   |
| G solv                  | -2908.3777     | 31.8516          | 4.4601                   |
| TOTAL                   | -6357.2983     | 40.7549          | 5.7068                   |
| <b>Receptor</b>         |                |                  |                          |
| <i>Energy Component</i> | <i>Average</i> | <i>Std. Dev.</i> | <i>Std. Err. of Mean</i> |
| VDWAALS                 | -2381.8500     | 21.1953          | 2.9679                   |
| EEL                     | -21303.2624    | 59.0269          | 8.2654                   |
| EPB                     | -2990.3196     | 31.5150          | 4.4130                   |
| ENPOLAR                 | 72.5069        | 0.4463           | 0.0625                   |
| G gas                   | -3407.4180     | 46.8125          | 6.5551                   |
| G solv                  | -2917.8128     | 31.4944          | 4.4101                   |
| TOTAL                   | -6325.2307     | 41.7461          | 5.8456                   |
| <b>Ligand</b>           |                |                  |                          |
| <i>Energy Component</i> | <i>Average</i> | <i>Std. Dev.</i> | <i>Std. Err. of Mean</i> |

|                                              |          |        |        |
|----------------------------------------------|----------|--------|--------|
| VDWAALS                                      | -2.0627  | 0.5401 | 0.0756 |
| EEL                                          | 1.1780   | 0.7754 | 0.1086 |
| EPB                                          | -17.4245 | 0.6748 | 0.0945 |
| ENPOLAR                                      | 2.2665   | 0.0186 | 0.0026 |
| G gas                                        | 4.3047   | 3.2440 | 0.4542 |
| G solv                                       | -15.1581 | 0.6740 | 0.0944 |
| TOTAL                                        | -10.8533 | 3.1729 | 0.4443 |
| <b>Differences (Complex-Receptor-Ligand)</b> |          |        |        |
| VDWAALS                                      | -21.6116 | 2.2292 | 0.3121 |
| EEL                                          | -24.1963 | 3.3771 | 0.4729 |
| EPB                                          | 27.1551  | 2.1529 | 0.3015 |
| ENPOLAR                                      | -2.5619  | 0.0472 | 0.0066 |
| $\Delta G$ gas                               | -45.8074 | 2.5524 | 0.3574 |
| $\Delta G$ solv                              | 24.5932  | 2.1380 | 0.2994 |
| $\Delta$ TOTAL                               | -21.2142 | 1.7204 | 0.2409 |

**Table S17.** Highly frustrated contact of the residues that are forming the **Loop Cys44-Pro52**. R(-)Ibuprofen-SARS-CoV-2 Complex in red and S(+)-Ibuprofen-SARS-CoV-2 Complex in black.

| Res1               | Res2 | IC_Contact | IC_total          | FrustrationState |
|--------------------|------|------------|-------------------|------------------|
| <b>Condition 1</b> |      |            |                   |                  |
| 44                 | 47   | 0.9512     | 1.32117783941774  | MAX              |
| 44                 | 47   | 0.8902     | 1.31889015131908  | MAX              |
| 44                 | 48   | 0.9959     | 0.718899758212992 | MAX              |
| 46                 | 49   | 1          | 0.57998835911734  | MAX              |
| 46                 | 48   | 0.9959     | 0.615212122874075 | MAX              |
| 46                 | 49   | 0.9959     | 0.544869951910359 | MAX              |
| 47                 | 50   | 0.9471     | 0.544623860686514 | MAX              |
| 47                 | 50   | 0.9796     | 0.732242498348354 | MAX              |
| 48                 | 51   | 1          | 0.926396689059416 | MAX              |

|                    |     |        |                   |     |
|--------------------|-----|--------|-------------------|-----|
| 48                 | 51  | 0.9959 | 0.872855899152643 | MAX |
| 48                 | 54  | 0.9186 | 1.36096404744368  | MAX |
| 48                 | 54  | 0.9430 | 1.36096404744368  | MAX |
| 48                 | 57  | 1      | 0.665827948338456 | MAX |
| 48                 | 57  | 0.9959 | 0.911682219947375 | MAX |
| 50                 | 52  | 0.9959 | 0.390013452989012 | MAX |
| 51                 | 53  | 1      | 0.750107400369383 | MAX |
| 51                 | 53  | 0.9959 | 0.769291268861354 | MAX |
| 51                 | 54  | 0.9918 | 1.21677100324897  | MAX |
| 51                 | 54  | 0.9512 | 1.32117783941774  | MAX |
| 52                 | 54  | 0.9959 | 0.898471274330148 | MAX |
| <b>Condition 2</b> |     |        |                   |     |
| 44                 | 47  | 0.9674 | 1.36096404744368  | MAX |
| 44                 | 47  | 1      | 1.36096404744368  | MAX |
| 44                 | 48  | 1      | 0.95421786488322  | MAX |
| 46                 | 48  | 1      | 1.19553701344741  | MAX |
| 46                 | 48  | 1      | 1.15408623993896  | MAX |
| 46                 | 49  | 1      | 0.837709974214813 | MAX |
| 46                 | 49  | 1      | 0.81455339691634  | MAX |
| 48                 | 52  | 1      | 0.781428700518709 | MAX |
| 48                 | 54  | 0.8536 | 1.36096404744368  | MAX |
| 52                 | 188 | 0.9918 | 0.707779264708386 | MAX |
| 52                 | 188 | 1      | 0.760355472030494 | MAX |
| <b>Condition 3</b> |     |        |                   |     |
| 44                 | 47  | 0.9878 | 1.36096404744368  | MAX |
| 44                 | 47  | 0.5894 | 1.36096404744368  | MAX |
| 44                 | 48  | 1      | 1.15408623993896  | MAX |
| 46                 | 48  | 1      | 0.64066495183839  | MAX |
| 46                 | 48  | 1      | 0.95421786488322  | MAX |

|                    |    |        |                   |     |
|--------------------|----|--------|-------------------|-----|
| 46                 | 49 | 1      | 0.781428700518709 | MAX |
| 47                 | 50 | 0.9959 | 1.15343692472228  | MAX |
| 48                 | 51 | 1      | 1.29283942163836  | MAX |
| 48                 | 54 | 0.9634 | 1.36096404744368  | MAX |
| 48                 | 57 | 1      | 0.998386679403042 | MAX |
| 51                 | 54 | 0.6869 | 1.16865365987039  | MAX |
| 51                 | 54 | 1      | 1.36096404744368  | MAX |
| 52                 | 54 | 0.9959 | 1.2172378775043   | MAX |
| <b>Condition 4</b> |    |        |                   |     |
| 44                 | 47 | 1      | 1.36096404744368  | MAX |
| 44                 | 47 | 0.9552 | 1.21241455701333  | MAX |
| 44                 | 48 | 1      | 0.559494154310152 | MAX |
| 44                 | 48 | 1      | 1.02965843438589  | MAX |
| 46                 | 48 | 1      | 1.17437901999795  | MAX |
| 46                 | 49 | 1      | 1.15408623993896  | MAX |
| 47                 | 50 | 0.9959 | 0.690808165453571 | MAX |
| 48                 | 51 | 1      | 0.710941625795327 | MAX |
| 48                 | 51 | 1      | 0.968600474504709 | MAX |
| 48                 | 54 | 0.9634 | 1.36096404744368  | MAX |
| 48                 | 54 | 0.9536 | 1.36096404744368  | MAX |
| 48                 | 57 | 1      | 0.546480319171419 | MAX |
| 48                 | 57 | 0.9918 | 0.530774076025637 | MAX |
| 51                 | 53 | 1      | 0.516136533531159 | MAX |
| 51                 | 54 | 0.9796 | 1.13098307587172  | MAX |
| 51                 | 54 | 0.9959 | 1.3225604737177   | MAX |
| 52                 | 54 | 0.9959 | 1.09664893369632  | MAX |

**Table S18.** Highly frustrated contact of the residues that are forming the **Linker Loop**. R(-)Ibuprofen-SARS-CoV-2 Complex in red and S(+)-Ibuprofen-SARS-CoV-2 Complex in black.

| Res1               | Res2 | IC_Contacts | IC_total          | FrustrationState |
|--------------------|------|-------------|-------------------|------------------|
| <b>Condition 1</b> |      |             |                   |                  |
| 182                | 184  | 0.9024      | 1.31937009832559  | MAX              |
| 183                | 185  | 1           | 0.81455339691634  | MAX              |
| 183                | 185  | 1           | 0.648899992553133 | MAX              |
| 185                | 192  | 0.9390      | 0.893342219718786 | MAX              |
| 185                | 192  | 1           | 0.983317726069981 | MAX              |
| 184                | 186  | 1           | 1.15408623993896  | MAX              |
| 184                | 186  | 1           | 0.781428700518709 | MAX              |
| 186                | 188  | 1           | 0.521959986075983 | MAX              |
| 186                | 190  | 1           | 1.32282472525741  | MAX              |
| 186                | 192  | 0.9065      | 0.733999617068083 | MAX              |
| 186                | 192  | 0.9837      | 0.573424368032343 | MAX              |
| 190                | 192  | 1           | 0.510433379165587 | MAX              |
| 185                | 192  | 1           | 0.983317726069981 | MAX              |
| 183                | 195  | 0.5731      | 0.702772781630463 | MAX              |
| 184                | 193  | 0.6951      | 0.576184848329131 | MAX              |
| <b>Condition 2</b> |      |             |                   |                  |
| 182                | 184  | 0.7601      | 1.36096404744368  | MAX              |
| 185                | 190  | 0.6097      | 0.514756847547976 | MAX              |
| 185                | 192  | 1           | 1.29283942163836  | MAX              |
| 184                | 186  | 1           | 1.36096404744368  | MAX              |
| 186                | 188  | 1           | 0.72046674696313  | MAX              |
| 186                | 188  | 1           | 0.803302936778609 | MAX              |
| 186                | 190  | 1           | 1.36096404744368  | MAX              |
| 186                | 190  | 1           | 1.15408623993896  | MAX              |
| 186                | 192  | 1           | 1.21770145472988  | MAX              |
| 52                 | 188  | 1           | 0.760355472030494 | MAX              |

|                    |     |        |                   |     |
|--------------------|-----|--------|-------------------|-----|
| 52                 | 188 | 0.9918 | 0.707779264708386 | MAX |
| 183                | 195 | 0.6544 | 1.02519248974497  | MAX |
| 190                | 192 | 1      | 1.01382641900365  | MAX |
| 165                | 192 | 0.7439 | 0.539038102268355 | MAX |
| <b>Condition 3</b> |     |        |                   |     |
| 182                | 184 | 0.9065 | 1.1823349656614   | MAX |
| 183                | 185 | 1      | 0.792263180506606 | MAX |
| 185                | 189 | 0.6544 | 0.654195624706034 | MAX |
| 185                | 190 | 0.5487 | 0.535337521285786 | MAX |
| 185                | 190 | 0.6910 | 0.663198846808258 | MAX |
| 185                | 192 | 1      | 0.616847740184277 | MAX |
| 185                | 192 | 0.9512 | 0.567062688318587 | MAX |
| 184                | 186 | 1      | 1.2659468017726   | MAX |
| 186                | 188 | 1      | 0.64066495183839  | MAX |
| 186                | 189 | 0.7195 | 0.923175544685279 | MAX |
| 186                | 190 | 1      | 1.07977025101164  | MAX |
| 186                | 190 | 0.7764 | 0.708919459670825 | MAX |
| 186                | 192 | 0.7235 | 0.681378850165387 | MAX |
| 189                | 191 | 1      | 0.710941625795327 | MAX |
| <b>Condition 4</b> |     |        |                   |     |
| 184                | 186 | 1      | 1.21770145472988  | MAX |
| 182                | 185 | 1      | 0.434751834709015 | MAX |
| 183                | 185 | 1      | 0.594318202261694 | MAX |
| 183                | 185 | 1      | 0.648899992553133 | MAX |
| 185                | 190 | 0.6869 | 0.552038971970804 | MAX |
| 185                | 192 | 1      | 1.07977025101164  | MAX |
| 185                | 192 | 1      | 0.983317726069981 | MAX |
| 184                | 186 | 1      | 1.21770145472988  | MAX |
| 184                | 186 | 1      | 0.781428700518709 | MAX |
| 186                | 190 | 0.9959 | 1.2926095303848   | MAX |

|     |     |        |                   |     |
|-----|-----|--------|-------------------|-----|
| 186 | 192 | 1      | 0.781428700518709 | MAX |
| 190 | 192 | 1      | 0.683383325583724 | MAX |
| 185 | 190 | 0.6869 | 0.552038971970804 | MAX |
| 185 | 192 | 1      | 1.07977025101164  | MAX |
| 186 | 190 | 0.9959 | 1.2926095303848   | MAX |
| 186 | 192 | 1      | 0.781428700518709 | MAX |
| 186 | 192 | 0.9837 | 0.573424368032343 | MAX |
| 190 | 192 | 1      | 0.683383325583724 | MAX |
| 183 | 195 | 0.5731 | 0.702772781630463 | MAX |
| 184 | 193 | 0.6951 | 0.576184848329131 | MAX |
| 185 | 192 | 1      | 0.983317726069981 | MAX |
| 186 | 192 | 0.9837 | 0.573424368032343 | MAX |
